# Supplementary material for: How can the European Ecodesign Directive guide the deployment of hydrogen-related products for mobility?
Source: Royal Society of Chemistry journal article supplement (doi:10.1039/d2se01486f), 2023-01-01
Supplement: d2se01486f2.xlsx [file d2se01486f2.xlsx]

## Sheet: Inputs
	Version 3.06 VHK for European Commission 2011, modified by IZM for european commission 2014		Document subject to a legal notice (see below)
	ECO-DESIGN OF ENERGY RELATED/USING PRODUCTS			EcoReport 2014: INPUTS Assessment of Environmental Impact
	Nr	Product name: PEM Fuel Cell System (190 kW - 2020 SoA)		Date: January 2023	Author: IMDEA Energy
	Pos	MATERIALS Extraction & Production	Weight	Category	Material or Process	Recyclable?
	nr	Description of component	in g	Click &select	select Category first !
	1	Platinum	76	8-Extra	Platinum
	2	Carbon black particles	2342.46	8-Extra	Carbon black particles
	3	Ionomer	682.417	8-Extra	Ionomer
	4	PET	22475.4	1-BlkPlastics	10 -PET
	5	Thermoactive glue	5620.83	8-Extra	Thermoactive glue
	6	GDL (Carbon fibre+PTFE)	3495.76	8-Extra	106-Carbon fibre reinforced plastic	0.0170821
	7	Stainless steel	85589.1	3-Ferro	26 -Stainless 18/8 coil
	8	Silicone	19791.7	8-Extra	Silicone
	9	Glass-reinforced thermoplastic	3800	2-TecPlastics	19 -E-glass fibre
	10	Copper	3760.42	4-Non-ferro	30 -Cu wire
	11	Steel	14535	3-Ferro	23 -St tube/profile
	12
	13	BoP	130625	8-Extra	BoP
	14
	15	Tank	175000	8-Extra	106-Carbon fibre reinforced plastic	0.982918
	16
	17	Aux. Battery	278618	8-Extra	Aux. Battery
		TOTAL	746412
	Pos	MANUFACTURING	Weight	Percentage	Category index (fixed)
	nr	Description	in g	Adjust
	201	OEM Plastics Manufacturing	26275.4		21
	202	Foundries Fe/Cu/Zn	0		35
	203	Foundries Al/Mg	0		36
	204	Sheetmetal Manufacturing	85589.1		37
	205	PWB Manufacturing	0		54
	206	Other materials	634547
	207	Sheetmetal Scrap	21397.3	0.25	38
	Pos	DISTRIBUTION (incl. Final Assembly)		Answer	Category index (fixed)
	nr	Description
	208	Is it an ICT or Consumer Electronics product <15 kg ?		NO	60		0
	209	Is it an installed appliance (e.g. boiler)?	0	NO	61		1
	210				63		1
	211	Volume of packaged final product in m3	in m3	0.501906	64		0
	212				65		1
	Pos	USE PHASE indirect ErP impact		unit	Subtotals
	nr	Description
	213	ErP Product service Life in years	15	years
		Electricity
	214	On-mode: Consumption per hour, cycle, setting, etc.	0	kWh	0
	215	On-mode: No. of hours, cycles, settings, etc. / year	0	#
	216	Standby-mode: Consumption per hour	0	kWh	0
	217	Standby-mode: No. of hours / year	0	#
	218	Off-mode: Consumption per hour	0	kWh	0
	219	Off-mode: No. of hours / year	0	#
		TOTAL over ErP Product Life	0	MWh (=000 kWh)	66
		Heat
	218	Avg. Heat Power Output (when saving use a negative value)		kW
	219	No. of hours / year		hrs.
	220	Type and efficiency (Click & select)		1	86 -not applicable
		TOTAL over ErP Product Life	0	GJ
		Consumables (excl, spare parts)			material
	221	Water	0	m3/year	84-Water per m3
	222	Auxilliary material 1 (Click & select)	3100	kg/ year	122-Hydrogen (REDII Threshold)	122-Hydrogen (REDII Threshold)
	223	Auxilliary material 2 (Click & select)	0	kg/ year	86 -None	86 -None
	224	Auxilliary material 3 (Click & select)	0	kg/ year	86 -None
	225	Refrigerant refill (Click & select type, even if there is no refill )	0	kg/ year	1 -none; 0000
		Maintenance, Repairs, Service
		not affected
	Pos	USE PHASE direct ErP impact		unit	Subtotals
	nr	Description
	226	ErP Product (service) Life in years	15	years
		Electricity
	227	On-mode: Consumption per hour, cycle, setting, etc.	0	kWh	0
	228	On-mode: No. of hours, cycles, settings, etc. / year	0	#
	229	Standby-mode: Consumption per hour	0	kWh	0
	230	Standby-mode: No. of hours / year	0	#
	231	Off-mode: Consumption per hour	0	kWh	0
	232	Off-mode: No. of hours / year	0	#
		TOTAL over ErP Product Life	0	MWh (=000 kWh)	66
		Heat
	233	Avg. Heat Power Output	0	kW
	234	No. of hours / year	0	hrs.
	235	Type and efficiency (Click & select)		8	86-not applicable
		TOTAL over ErP Product Life	0	GJ
		Consumables (excl, spare parts)			material
	236	Water	0	m3/year	84-Water per m3
	237	Auxilliary material 1 (Click & select)	0	kg/ year	86 -None
	238	Auxilliary material 2 (Click & select)	0	kg/ year	86 -None
	239	Auxilliary material 3 (Click & select)	0	kg/ year	86 -None	86 -None
	240	Refrigerant refill (Click & select type, even if there is no refill )	0	kg/ year	1 -none; 0000
		Maintenance, Repairs, Service
	241	No. of km over Product-Life	0	km / Product Life	87
	242	Spare parts (fixed, 1% of product materials & manuf.)	7464.12	g	0.01
	Pos	ENERGY TOTAL (=indirect + direct ErP impact in use phase)		unit	Subtotals				Pos	DISPOSAL & RECYCLING
	nr	Description							nr	Description
		Electricity			15
	243	TOTAL over Product Life of ERP	0	MWh (=000 kWh)	66			EoL	253	product (stock) life L, in years	15		Please edit values with red font
		Heat
	244	extra for extraction and transport, ErP indirect	0								current		L years ago		period growth PG in %			CAGR in %/a
	245	extra for extraction and transport, ErP direct	0						254	unit sales in million units/year	0.2		0.05		3			0.096825
	246	TOTAL over Product Life of ERP indirect	0	GJ	86 -not applicable				255	product & aux. mass over service life, in g/unit	4.72539e+07		4.72539e+07		0			0
	247	TOTAL over Product Life of ERP direct	0	GJ	86-not applicable				256	total mass sold, in t (1000 kg)	9450.78		2362.69		3			0.096825
		Consumables (excl, spare parts)			material															0.000367134	0.0113157	0.00329655	0.86226	0.0271526	0.0956077		0.997171	0.0028292
	248	Water, Total over ErP Product Life	0	m3	84-Water per m3					Per fraction (post-consumer)	1	2	3	4	5	6	7a	7b	7c	8	8	8	8	8	8		9	9
	249	Auxilliary material 1	46500	kg	121-Hydrogen (Green)						Bulk Plastics	TecPlastics	Ferro	Non-ferro	Coating	Electronics	Misc. , excluding refrigant & Hg	refrigerant	Hg (mercury), in mg/unit	Extra (Platinum)	Extra (CB particles)	Extra (Nafion)	Extra (CFRP)	Extra (Glue)	Extra (Silicone)	Extra (Aux. Bat)	Auxiliaries (Hydrogen)	Extra (BoP)	TOTAL (CARG avg.)
	250	Auxilliary material 2	0	kg	86 -None				257	current fraction, in % of total mass (or mg/unit Hg)	0.000480387	8.12209e-05	0.00214004	8.03748e-05	0	0	0	0	0	1.62442e-06	5.00676e-05	1.45859e-05	0.00381515	0.000120139	0.000423025	0.00595514	0.984046	0.00279197	1
	251	Auxilliary material 3	0	kg	86 -None				258	fraction x years ago, in % of total mass	0.000480387	8.12209e-05	0.00214004	8.03748e-05	0	0	0	0	0	1.62442e-06	5.00676e-05	1.45859e-05	0.00381515	0.000120139	0.000423025	0.00595514	0.984046	0.00279197	1
	252	Refrigerant refill (Click & select type, even if there is no refill )	0	kg	Average GWP is 0				259	CAGR per fraction r, in %	0.096825	0.096825	0.096825	0.096825	0	0	0	0	0	0.096825	0.096825	0.096825	0.096825	0.096825	0.096825	0.096825	0.096825	0.096825	0.096825
										current product mass in g	22700.2	3838	101125	3798.02	0	0	0	0	0	76.76	2365.89	689.241	180281	5677.04	19989.6	281404	46500000	131931	4.72539e+07
									260	stock-effect, total mass in g/unit	17025.1	2878.5	75844	2848.52	0	0	0	0	0	57.57	1774.42	516.931	135211	4257.78	14992.2	211053	3.4875e+07	98948.4	3.54404e+07	0.75
		Economics inputs							261	EoL available, total mass ('arisings') in g/unit	5675.04	959.5	25281.3	949.505	0	0	0	0	0	19.19	591.472	172.31	45070.2	1419.26	4997.4	70350.9	1.1625e+07	32982.8	1.18135e+07	0.25
									262	EoL available, subtotals in g		6634.54		26230.8		0	0	0	0	19.19	591.472	172.31	45070.2	1419.26	4997.4	70350.9	1.1625e+07	32982.8	1.18135e+07
																													AVG
									263	EoL mass fraction to re-use, in %	1	0	1	1						0	0	0	0.980415	0	1	0.01	0	1	0.00971578
									264	EoL mass fraction to (materials) recycling, in %	0	1	0	0						0.75	0	0	0	0	0	0	0	0	8.24392e-05
									265	EoL mass fraction to (heat) recovery, in %	0	0	0	0						0	0	0	0	0	0	0.09	0	0	0.000535963
									266	EoL mass fraction to non-recov. incineration, in %	0	0	0	0						0	0	0.5	0	1	0	0.23	0	0	0.00149712
									267	EoL mass fraction to landfill/missing/fugitive, in %	0	0	0	0						0.25	1	0.5	0.0195846	0	0	0.67	1	0	0.988169
									268	TOTAL	1	1	1	1						1	1	1	1	1	1	1	1	1	1
									269	EoL recyclability****, (click& select: 'best', '>avg', 'avg' (basecase); '< avg'.; 'worst')	avg	avg	avg	avg	avg	avg	avg	avg	avg	avg	avg	avg	avg	avg	avg		avg	avg	avg
											0	0	0	0	0	0	0	0	0	0	0	0	0	0	0		0	0	0
										L is product (stock) life = period between product purchased and product discarded
										PG=growth rate over period of L years= (value current - value L years ago)/(value L years ago)
										CAGR=Compound Annual Growth Rate = (1+ PG)^(1/L) - 1 (^= to the power)
										EoL available mass' or 'arisings' = Total mass available for End-of-Life (EoL) management = recycmax * current fraction * product mass, with recycmax=1/(1+CAGR)^L,
										'stock' = the surplus (or deficit) of mass in stock (in use or stored with consumer) due to growth (or decline) of the unit sales or the share of the materials fraction over a period that equals the product life. stock= stock-effect arisings - product mass*current fraction ; '
										're-use'= fraction of EoL available mass in components that can be re-used in new products. The generic credit relative to the re-used mass is 75% on all impacts and for all fractions, taking into account the impact of collection, sorting, cleaning, etc. (as opposed to MEEuP 2005, where the collection effort was calculated separately). In case the specific re-use credit found for a specific produ…
										recycling'= fraction of EoL available mass that is recycled for its materials. For metals this is already included in the production impact, based roughly on the fraction mentioned (values cannot be edited). For plastics, electronics, miscellaneous materials, refrigerants, mercury and the extra materials these values need to be edited (overwrite default values). The credit relates to the recyled …
										For electronics (PWBs, ICs, controllers, displays, etc.) main credits come from recovery of metals (Cu, Fe, tin, traces of Au, Pt, Pd), glass (from displays, cullet displaces virgin material mainly in fiberglass insulation) and avoidance of treatment of hazardous substances (e.g. Pb, Cd, etc.). Note that the WEEE recast impact assessment report found official electronics recycling rates to be low…
										'(heat) recovery' = fraction of EoL available mass where the combustion heat is used, e.g. for district heating. In the context of ErP it is assumed to apply only to plastics and all other materials for which a feedstock energy value is given. The credit is 75% of feedstock energy (net combustion value) and GWP.
										'non-recov. Incineration' = fraction of EoL available mass that is incinerated without heat recovery, either because there is no effective contribution to the combustion (non-combustibles) , the incineration plant has no clients for waste heat, etc.. Impacts of 'incineration' as given in the Unit Indicator table (see MEErP Methodology Report Part 2, Table 13, row 92) apply.
										'landfill/fugitive/missing' = fraction of EoL available mass that goes to landfill, that escapes during use (for substances that are gaseous or evaporate at atmospheric conditions like most refrigerants and mercury) and that are unaccounted for (illegal dumping etc.). Impacts of 'landfill' as given in the Unit Indicator table (see MEErP Methodology Report Part 2, Table 13, row 89) apply.
										'recyclability' relates to the potential of the new products to change the course of the materials flows , e.g. due to faster pre- disassembly or other ways to bring about less contamination of the mass to be recycled (see MEErP Methodology Report Part 2) . Therefore it is economically likely that the recycled mass at EoL will displace more virgin material in other applications . The recyclabilit…
	Inputs for EU-Totals & LCC
		INPUTS FOR EU-Totals & economic Life Cycle Costs		unit
	nr	Description
	A	Product Life	15	years
	B	Annual sales		mln. Units/year
	C	EU Stock		mln. Units
	D	Product price	51023.3	Euro/unit
	E	Installation/acquisition costs (if any)		Euro/ unit
	F	Fuel rate (gas, oil, wood)		Euro/GJ
	G	Electricity rate		Euro/kWh
	H	Water rate		Euro/m3
	I	Aux. 1: Hydrogen	11	Euro/kg
	J	Aux. 2 : BoP	0	Euro/kg
	K	Aux. 3:	0	Euro/kg
	L	Repair & maintenance costs	2551.17	Euro/ unit
	M	Discount rate (interest minus inflation)	0.04	%
	N	Escalation rate (project annual growth of running costs)	-0.0555556	%
	O	Present Worth Factor (PWF) (calculated automatically)	7.55527	(years)
	P	Ratio efficiency STOCK: efficiency NEW, in Use Phase
	Legal notice
	This document does not necessarily reflect the view of the European Commission. It was drafted to the best of ability within budget restrictions. VHK and the European Commission do not assume any liability for any material or immaterial damage from using this document or information contained therein.
	Copyright ©Van Holsteijn en Kemna BV 2005-2011. Distribution rights European Commission 2005-2011. Duplication allowed if source, draft version and legal notice are mentioned.

## Sheet: Extra Materials
		Use these fields to add extra materials to the eco-report, these materials will be added to the list and can be selected on the input tab. Select category 8-Extra, and the new materials will appear under material or process. The values are per kg material. Fill in new materials for production of the ErP in rows 1-120 (category 'Extra') and for the Use phase in rows 121-125 (category 'Auxiliaries'…
		nr	Name material	Mass	GWP
		unit	New Materials production phase (category 'Extra')	Kg	kg CO2 eq.
		102	Platinum	0.076	70122.4
		103	Carbon black particles	2.34246	1.84373
		104	Ionomer	0.682417	959
		105	Thermoactive glue	5.62083	3.39386
		106	Carbon fibre reinforced plastic	178.496	85.8454
		107	Silicone	19.7917	2.92778
		108	BoP	130.625	7.02749
		109	Aux. Battery	278.618	13.26
		110
		111
		112
		113
		114
		115
		116
		117
		118
		119
		120
			New Materials use phase (category 'Auxiliaries')
		121	Hydrogen (RED II Threshold)		3.384
		122
		123
		124
		125

## Sheet: RAW
	Version 3.06 VHK for European Commission 2011, modified by IZM for european commission 2014
	ECO-DESIGN OF ENERGY-RELATED PRODUCTS
	Nr:	0		Products
	MATERIALS EXTRACTION & PRODUCTION
	nr				Mass	Emissions to Air
		Totals			746412	26657.6
		Component	Category	Material	Weight [g]	GWP [kg CO2-eq]
	1	Platinum	8-Extra	102-Platinum	76	5329.3
	2	Carbon black particles	8-Extra	103-Carbon black particles	2342.46	4.31887
	3	Ionomer	8-Extra	104-Nafion	682.417	654.438
	4	PET	1-BlkPlastics	10 -PET	22475.4	69.8855
	5	Thermoactive glue	8-Extra	105-Thermoactivable glue	5620.83	19.0763
	6	GDL (Carbon fibre+PTFE)	8-Extra	106-Carbon fibre reinforced plastic	3495.76	300.095
	7	Stainless steel	3-Ferro	26 -Stainless 18/8 coil	85589.1	531.096
	8	Silicone	8-Extra	107-Silicone	19791.7	57.9456
	9	Glass-reinforced thermoplastic	2-TecPlastics	19 -E-glass fibre	3800	12.7539
	10	Copper	4-Non-ferro	30 -Cu wire	3760.42	23.3273
	11	Steel	3-Ferro	23 -St tube/profile	14535	19.9925
	12	0	0	0	0	0
	13	BoP	8-Extra	108-BoP	130625	917.965
	14	0	0	0	0	0
	15	Tank	8-Extra	106-Carbon fibre reinforced plastic	175000	15022.9
	16	0	0	0	0	0
	17	Aux. Battery	8-Extra	109-Aux. Battery	278618	3694.47
		TOTAL	0	0	746412	26657.6
	MANUFACTURING
	nr				Mass	Emissions to Air
		Totals			0	148.529
		Description		Category index	Weight [g]	GWP [kg CO2-eq]
	201	OEM Plastics Manufacturing	0	21		59.5563
	202	Foundries Fe/Cu/Zn	0	35		0
	203	Foundries Al/Mg	0	36		0
	204	Sheetmetal Manufacturing	0	37		71.851
	205	PWB Manufacturing	0	54		0
	206	Other materials	0	0		0
	207	Sheetmetal Scrap	0.25	38		17.1217
		TOTAL				148.529
	DISTRIBUTION
	nr					Emissions to Air
		Totals				46.6883
		Description		Category index		GWP [kg CO2-eq]
	208	Appliannce per product		61		4.5247
	209	Appliance per volume		61		23.4231
	210	Retail per volume		63		14.7128
	211	Product volume	0.501906	64		0
	212	Retail per product		65		4.02775
		TOTAL				46.6883
	USE PHASE
	nr				Mass	Emissions to Air
		Totals			4.65075e+07	157624
		Description	Value	Unit	Weight [g]	GWP [kg CO2-eq]
	213	ErP Product service Life in years	15	years	0
		Electricity	0	0	0
	214	On-mode: Consumption per hour, cycle, setting, etc.	0	kWh	0
	215	On-mode: No. of hours, cycles, settings, etc. / year	0	#	0
	216	Standby-mode: Consumption per hour	0	kWh	0
	217	Standby-mode: No. of hours / year	0	#	0
	218	Off-mode: Consumption per hour	0	kWh	0
	219	Off-mode: No. of hours / year	0	#	0
	0	TOTAL over Product Life of ERP	Subtotal electricity		0	0
	0	Heat	0	0
	246	TOTAL over Product Life of ERP indirect	0	GJ	0	0
	247	TOTAL over Product Life of ERP direct	0	GJ	0	0
		Consumables
	248	Water, Total over ErP Product Life	0	m3	0	0
	249	Hydrogen fuel	46500	kg	46500000	157356
	250	BoP	0	kg	0	0
	251	Auxilliary material 3	0	kg	0	0
	225	Refrigerant refill (Click & select type, even if there is no refill )	0	kg	0
	0	Manteinance	0		7464.12	265.118
	241	No. of km over Product-Life	0	km / Product Life	0	0
	242	Spare parts	7464.12	g	7464.12	268.061
		TOTAL			4.65075e+07	157624
	DISPOSAL/RECYCLING
	nr				Mass	Emissions to Air
		Totals			4.72539e+07	-3479.72
		EoL Scenario	Mass fraction (%)		Weight [g]	GWP [kg CO2-eq]																		*Materials in use phase are only modelled for GWP and AP indicators
	263	Re-use	0.00929276		439119	-3116.65
	264	Recycle	8.24392e-05		3895.57	-400.973
	265	Recovery	0.000535963		25326.3	-24.9377
	266	Incineration	0.00192014		90734.1	38.0338
	267-269	Landfill/ Fugitives	0.988169		4.66948e+07	24.81
		TOTAL			4.72539e+07	-3479.72
		of which
	263-265	reuse/recycle/recover	0.00991116		468341	-3542.56
	266-269	incinerate/landfill	0.990089		4.67855e+07	62.8438

## Sheet: Results
	Version 3.06 VHK for European Commission 2011, modified by IZM for european commission 2014						Document subject to a legal notice (see below)
	ECO-DESIGN OF ENERGY-RELATED PRODUCTS							EcoReport 2014: OUTPUTS Assessment of Environmental Impact
	Life Cycle Impact (per unit) of PEM Fuel Cell System (190 kW - 2020 SoA)
	Nr	Life cycle Impact per product:						2020		IMDEA Energy
	0	PEM Fuel Cell System (190 kW - 2020 SoA)
								121-Hydrogen (Green)
		Life Cycle phases -->		PRODUCTION			DISTRIBUTION	USE	END-OF-LIFE				TOTAL
		Resources Use and Emissions		Material	Manuf.	Total			Disposal	Recycl.	Stock	Total
		Emissions (Air)
	17	GWP	kg CO2 eq.	26657.6	148.529	26806.1	46.6883	157623	62.8438	-3542.56		-3479.72	180996
	Life Cycle Impact (per unit) of PEM Fuel Cell System (190 kW - 2020 SoA)
	Nr	Life cycle Impact per product:						2020		IMDEA Energy
	0	PEM Fuel Cell System (190 kW - 2020 SoA)
								121-Hydrogen (Green)
		Life Cycle phases -->		PRODUCTION			DISTRI-	USE	END-OF-LIFE*				TOTAL
		Resources Use and Emissions		Material	Manuf.	Total	BUTION		Disposal	Recycl.	Stock
		Emissions (Air)
	17	Greenhouse Gases in GWP100	kg CO2 eq.	1777.17	9.90193	1787.08	3.11256	10508.2	4.18959	-236.171			12066.4
	Table . Life Cycle Costs per product and Total annual expenditure (2005) in the EU-27
		PEM Fuel Cell System (190 kW - 2020 SoA)		LCC new product
		Item
	D	Product price		51023.3		€
	E	Installation/ acquisition costs (if any)		0		€
	F	Fuel (gas, oil, wood)		0		€
	F	Electricity		0		€
	G	Water		0		€
	H	Aux. 1: None		257635		€
	I	Aux. 2 :None		0		€
	J	Aux. 3: None		0		€
	K	Repair & maintenance costs		1284.98		€
		Total		309943		€

## Sheet: CRM
CRM indicator according to MEErP 2011 and CRM list 2020
	Critical Raw Material	Weight in g per product	Characterization factor [kg Sb eq./kg]	CRM indicator
	Platinum	76	17.5	1.33
	Natural graphite	2342.46	0.00537	0.012579
	Auxiliary battery	278618	0.0116124	3.23543
	CRM indicator			4.578

## Sheet: Data1
Material	production method		Materials
1-BlkPlastics	1 -LDPE		1-BlkPlastics
1-BlkPlastics	2 -HDPE		2-TecPlastics
1-BlkPlastics	2,5 -HDPE (recycled)		3-Ferro
1-BlkPlastics	3 -LLDPE		4-Non-ferro
1-BlkPlastics	4 -PP		5-Coating
1-BlkPlastics	5 -PS		6-Electronics
1-BlkPlastics	6 -EPS		7-Misc.
1-BlkPlastics	7 -HI-PS		8-Extra
1-BlkPlastics	8 -PVC
1-BlkPlastics	8,5 -PVC (recycled)
1-BlkPlastics	9 -SAN
1-BlkPlastics	10 -PET
1-BlkPlastics	10,5 -PET (recycled)
1-BlkPlastics	11 -ABS
2-TecPlastics	12 -PA 6
2-TecPlastics	13 -PC
2-TecPlastics	14 -PMMA
2-TecPlastics	15 -Epoxy
2-TecPlastics	16 -Rigid PUR
2-TecPlastics	17 -Flex PUR
2-TecPlastics	18 -Talcum filler
2-TecPlastics	19 -E-glass fibre
2-TecPlastics	20 -Aramid fibre
3-Ferro	22 -St sheet galv.
3-Ferro	23 -St tube/profile
3-Ferro	24 -Cast iron
3-Ferro	25 -Ferrite
3-Ferro	26 -Stainless 18/8 coil
4-Non-ferro	27 -Al sheet/extrusion
4-Non-ferro	28 -Al diecast
4-Non-ferro	29 -Cu winding wire
4-Non-ferro	30 -Cu wire
4-Non-ferro	31 -Cu tube/sheet
4-Non-ferro	32 -CuZn38 cast
4-Non-ferro	33 -ZnAl4 cast
4-Non-ferro	34 -MgZn5 cast
5-Coating	39 -pre-coating coil
5-Coating	40 -powder coating
5-Coating	41 -Cu/Ni/Cr plating
5-Coating	42 -Au/Pt/Pd
6-Electronics	43 -LCD per m2 scrn
6-Electronics	44 -CRT per m2 scrn
6-Electronics	45 -big caps & coils
6-Electronics	46 -slots / ext. ports
6-Electronics	47 -IC's avg., 5% Si, Au
6-Electronics	48 -IC's avg., 1% Si
6-Electronics	49 -SMD/ LED's avg.
6-Electronics	50 -PWB 1/2 lay 3.75kg/m2
6-Electronics	51 -PWB 6 lay 4.5 kg/m2
6-Electronics	52 -PWB 6 lay 2 kg/m2
6-Electronics	53 -Solder SnAg4Cu0.5
6-Electronics	98 -controller board
7-Misc.	55 -Glass for lamps
7-Misc.	56 -Bitumen
7-Misc.	57 -Cardboard
7-Misc.	58 -Office paper
7-Misc.	59 -Concrete
7-Misc.	91 -Refrigerant
8-Extra	100-Office paper (from recycled paper)
8-Extra	101-Office paper (from primary cellulose)
8-Extra	102-Platinum
8-Extra	103-Carbon black particles
8-Extra	104-Nafion
8-Extra	105-Thermoactive glue
8-Extra	106-Carbon fibre reinforced plastic
8-Extra	107-Silicone
8-Extra	108-BoP
8-Extra	109-Aux. Battery
8-Extra
8-Extra
8-Extra
8-Extra
8-Extra
8-Extra
8-Extra
8-Extra
8-Extra
8-Extra
8-Extra
NAME	"Auxiliaries"
9-Aux	86 -None
9-Aux	58 -Office paper
9-Aux	80 -Toner
9-Aux	81 -Detergent dishw.
9-Aux	82 -Rinsing agent dish
9-Aux	83 -Regen. Salt dishw
9-Aux	85 -Vacuum cl. bags
9-Aux	121-Hydrogen (RED II Threshold)
9-Aux
9-Aux
9-Aux
9-Aux
NAME	"Energy"
10-Energy	86 -not applicable
10-Energy	67 -Electric resistance 96
10-Energy	68 -Electr. heat pump 288
10-Energy	69 -Gas, atmospheric 86
10-Energy	70 -Gas, atmospheric 90
10-Energy	71 -Gas, condensing 101
10-Energy	72 -Gas, condensing 103
10-Energy	73 -Oil, atmospheric 85
10-Energy	74 -Oil, condensing 95
10-Energy	75 -Wood pellets 85
10-Energy	76 -Wood pellets 88
10-Energy	77 -Wood logs, low eff. 67
10-Energy	78 -Wood logs, higher eff. 74
NAME	"Refrigerants"
11-Refrig	1 -none; 0000
11-Refrig	2 -R134a; HFC; 1430
11-Refrig	3 -R404a; HFC blend; 3920
11-Refrig	4 -R407c; HFC blend; 1770
11-Refrig	5 -R410a; HFC blend; 2090
11-Refrig	6 -R290; propane; 3
11-Refrig	7 -R600a; iso-butane; 3
11-Refrig	8 -R744; CO2; 1
11-Refrig	9 -R717; ammonia; 0000
11-Refrig

## Sheet: Data2
					Materials & Energy UNIT INDICATORS				Primary Energy (MJ)	Electr energy (MJ)	fd(MJ)	water proces	Water cool	waste haz	waste non	GWP	AP	VOC	POP	Hma	PAH	PM	HMw	EP
					Plastics in KG	1	LDPE	0	77.8	13.31	51.54	3	45	4.448	44.186	1.89697	7.44464	0.49	0	0	0.1368	0.92	0	26.624
						2	HDPE	0	76.56	9.83	54.1	3.4	31	5.439	38.341	1.80784	6.09304	0.16	0	0	0.344	0.86	0	29.816
						2.5	HDPE (recycled)	0	9.44108	1.76		3.91245		0	0.079	0.667	0	0		0	0	0.053	0	0.061975
						3	LLDPE	0	73.98	10.17	47.45	2.4	116	3.368	30.732	1.85885	5.91424	0.07	0	0	0.0964	1.4	0	39.176
						4	PP	0	72.69	7.26	52.72	4.8	40	4.428	28.137	1.97451	5.61072	0.018	0	0	0.3836	0.75	0	164.558
						5	PS	0	86.73	3.62	47.53	4.9	177	0.686	21.836	2.79151	17.2245	0	0	0	120.843	1.5	0	55.494
						6	EPS	0	83.66	3.38	47.81	5.7	176	0.93	37.852	2.70201	18.134	0	0	0	60.8432	1.8	0	124.626
						7	HI-PS	0	92.23	4.67	49.13	5.5	186	0.64	30.048	2.90063	19.4331	0	0	0	60.8036	1.8	0	59.54
						8	PVC	0	56.61	11.11	22.93	11	62	5	67.088	2.16361	14.9922	0	0	0	0.0286	2.9	2.814	313.99
						8.5	PVC (recycled)	0	26			69.2				2.06	1.67							1.84
						9	SAN	0	89.4	3.82	47.17	6.1	163	4.1	31.558	3.00417	13.9816	0	0	0	0.3876	1.7	0	281
						10	PET	0	78.8	13.37	38.83	7.3	36	1.6	92.148	3.10942	34.3696	1.3	0	2.2662	1.452	5	0.002	380.262
						10.5	PET (recycled)	0	11.9182	1.66		4.80106		0	0.22	0.802	1.3e-05	0.037		0.03	0	0.039	0.00034228	2.0638
						11	ABS	0	95.02	6.95	45.77	9.3	165	10	91.927	3.32057	17.7702	0	0	0	1.8076	2.9	1.94	629.842
						12	PA 6	0	119.51	15.13	38.91	16	219	19	176.27	8.56185	39.0432	0.009	0	0	0.4036	5.4	49.02	1872.28
						13	PC	0	116.81	14.86	37.99	14	114	10	176.554	5.39285	25.4278	0	0	0	0.3632	6.7	0.164	504.02
						14	PMMA	0	110.19	13.08	41.82	9.8	26	1.4	104.774	6.00307	43.5655	0	0	0	0.0086	5.1	2.804	2068.02
						15	Epoxy	0	140.71	24.56	42.64	19	384	19	406.555	6.59125	43.9372	0	0	0	0.1164	15	0.036	9649.81
						16	Rigid PUR	0	104.257	17.4634	38.6742	60	301	19.592	427.167	4.17279	30.9856	0	0	0	20.198	7.361	43.198	3185.8
						17	Flex PUR	0	104.459	18.7189	39.785	70	298	32.391	548.771	4.48032	32.1058	0	0	0	20.1736	8.236	3.334	5685.59
					Plastics fillers, reinforcements, additives	18	Talcum filler		10.1415	0	0	0.1175	0	0.113717	5.72185	0.60619	3.07038	0.00185864	0.0323469	0.084666	0.625401	0.0640425	0.0318194	0.151731
						19	E-glass fibre		65.828	21.0879	10.7942	54.2995	271.304	7.05314	311.218	3.35629	29.1797	0.00463768	0	0	0.0648502	8.14493	47.342	3151.38
						20	Aramid fibre		256.729	82.2429	42.0974	211.768	1058.09	27.5072	1213.75	13.0895	113.801	0.018087	0	0	0.252916	31.7652	184.634	12290.4
					OEM Manufacturing	21	all plastic parts		40.8503	24.5922	1.4077	0.37	11.6	0	128	2.26662	9.77222	0.00289102	0	0	0.0125022	1.507	0	23.8787
					Metals in KG	22	St sheet galv.	0.05	33.7329	2.27851	0.074195	0	0	0	1721.52	2.82728	7.46512	0.136338	26	3.54464	0.0692364	2.70735	3.55014	65.1696
						23	St tube/profile	0.5	16.5653	4.57245	-0.15751	0	0	0	800.685	1.37547	3.59324	0.117337	12	2.58634	0.0325618	1.00336	1.56807	38.3307
						24	Cast iron	0.85	9.81729	0.134809	-0.0596287	1.3	3.66	0	315.356	1.0571	3.23218	0.118	6	1.9831	0.0131822	14	0.908644	26.2339
						25	Ferrite		50.5994	3.41776	0.111292	39.3345	0	0	2582.28	4.24091	11.1977	0.204507	39	36	0.103855	4.06103	2	79
						26	Stainless 18/8 coil	0.63	62.042	9.691	4.045	75.735	8.435	0	1000	6.20518	56.0209	0.136	7.7	148.305	0.028258	7.914	86.3674	2327.93
						27	Al sheet/extrusion	0.11	192.623	0	0	0	0	0	360	10.3485	67.3008	0.0660707	4.9925	3.6344	96.5358	16.916	35.0202	4.94786
						28	Al diecast	0.85	55.1352	0	0	0	0	0	150	3.54704	15.6247	0.073233	33.4888	0.836794	17.6713	4.04926	6.46814	1.2134
						29	Cu winding wire	0	142.72	0	0	0	0	0.798438	40.1747	7.36671	303.835	0.03	3.97212	56.5191	5.52954	3.02608	6	158.2
						30	Cu wire	0	116.55	0	0	0	0	0.241951	12.1742	6.20339	292.104	0.00962456	3.74382	55.0595	5.37989	2.84025	94.0944	154.52
						31	Cu tube/sheet	0.6	50.9231	0	0	0	0	0	13.9697	2.72798	62.5997	0.00475937	10.29	33.0866	5.35727	1.4595	37.6533	61.8823
						32	CuZn38 cast	0.85	38.4485	0	0	0	0	0.454095	43.1186	1.81256	35.0351	0.0101375	25.4982	57.1027	3.43702	1.22514	8.8928	15.1249
						33	ZnAl4 cast	0.85	28.2297	0	0	2.24315	0	0.538088	33.1123	1.10045	6.25371	0.010348	60	2.19409	0.896291	1.23097	0.329496	0.667419
						34	MgZn5 cast	0.5	161.806	0	0	118.5	13.0625	5.62342	286.324	18.3802	45.0275	0.0738301	27.3503	2.59958	48.7517	9.14009	17.8859	3.62311
					OEM Manufacturing	35	foundries Fe/Cu/Zn		2.1957	1.32183	0.0756638	0.0198875	0.6235	0	6.88	0.121831	0.525257	0.000155392	0	0	0.000671993	0.0810013	0	1.28348
						36	foundries Al		6.50578	3.91654	0.224189	0.0589259	1.84741	0	20.3852	0.36098	1.55632	0.000460422	0	0	0.00199109	0.240004	0	3.80291
						37	sheetmetal plant		15.1297	9.10824	0.52137	0.137037	4.2963	0	47.4074	0.839488	3.61934	0.00107075	0	0	0.00463044	0.558148	0	6
						38	sheetmetal scrap		11.9755	4.91083	0.019236	0	0	0.0604877	180.168	0.80018	3.58952	0.0872086	10.7672	25	0.00791445	0.515655	0.809753	0.0445925
					Coating/plating KG	39	pre-coating coil	0	313.91	83.36	42.64	19	384	19	406.555	15.5647	59.149	0.8	0.385409	1.00879	0.232492	15.3234	0.415125	9651.62
						40	powder coating	0	357.21	61.31	42.64	19	384	20.6937	491.774	17.808	62.9519	0.0276819	0.481762	1.26098	0.261515	15.4042	0.509906	9652.07
						41	Cu/Ni/Cr plating	0	2759	2583.9	0	187	1742	58.0682	20000	124.677	1675.92	3.1491	396.518	1935	5.03843	52.86	153	95004.4
						42	Au/Pt/Pd per g	0.25	225.32	202.52	0	0	0	26.0581	187500	17.7429	344.229	0.000949095	0.0165175	127.543	0.0112644	12.7639	0.0162482	0.0774796
					Electronics KG	43	LCD per m2 scrn		3563.69	2269.95	0	44.8462	670	1.03878	52.2677	184.32	58.5165	0.417	0.295481	0.773403	0.0888081	0.248025	0.278041	1.53602
						44	CRT per m2 scrn		3168.58	2130.63	0	290.216	0	49.2562	2468.35	171.337	1076.61	0.801465	13.9483	933.133	0	2828.03	13.9136	723.48
						45	big caps & coils		383.284	0	0	34.6555	55	19.6026	600.536	21.6706	141.819	0.12426	2.16256	7.66037	204.65	35.6146	74.2257	7.13802
						46	slots / ext. ports		187.068	59.3104	0	74.6567	255.36	17.0975	307.664	10.0255	184.362	0.0147878	1.39586	37.999	1.92867	12.9575	31.8012	6469.73
						47	large IC		8021.88	7950.8	0	0	0	236.688	8788.78	505.415	2787.34	69.0062	48.8369	446.578	14.6939	72.8544	3740	21481.1
						48	small IC		1786.73	1744.15	0	0	0	66.9296	1807.38	115.113	816.187	13.8027	9.79353	185.009	2.9514	24.1553	9.63384	4296.34
						49	SMD/ LED's avg.		2968.86	2885.56	0	925.438	0	130.685	2830.92	167.003	1620.47	7.48111	14.9862	421.726	4.52312	50.8251	14.7419	2195.5
						50	PWB 1/2 lay 3.75kg/m2		281.056	150.523	8.528	170.036	76.8	1733.25	2625.35	11.2209	213.762	2.3252	2.7089	36.1475	3.56937	5.07974	84.5047	3686.44
						51	PWB 6 lay 4.5 kg/m2		367.179	146.164	8.528	485.053	76.8	1891.79	4073.31	15.6944	395.993	1.0262	5.09217	70.0589	6.88709	37.0414	125.437	2442.75
						52	PWB 6 lay 2 kg/m2		487.89	332.925	11.5128	403.321	103.68	4255.85	2334.66	20.2103	219.394	0.0663226	3.01725	32.8035	3.28051	6.41629	326.386	2845.08
						53	Solder SnAg4Cu0.5		233.953	193.705	0	70.2	0	4.52932	227.9	11.5958	64.5108	0.0740294	1.28837	3.34204	1.86715	1.36602	0	6.04341
						54	PWB assembly		128	3	5	12	36	4	107	9	49	2	0	1	3	15	0	709
					Miscellaneous	55	Glass for lamps	0	16.225	12.9282	0	8.24176	0	0.268834	13.5268	0.833303	3.00417	0.00439396	0.0764701	0.176857	0.000286341	0.0641886	0.0395574	0.358702
						56	Bitumen	0	48	0	0	6	0	0	0	0.512257	3.43408	7.98	0.019	8.74068	0.112396	259	4.32396	292.009
						57	Cardboard	0.9	28	1.998	16	0	0	0.348026	52.3166	0.702192	1.03948	0.000752497	0.0130961	0.0342781	0.00393608	0.010989	0.0128825	86.0614
						58	Office paper	0	40	6.4239	27	0	0	0.348026	68.0481	0.578367	5.02165	0.202419	0.042106	0.11021	0.0126952	1.66033	0.0414194	5288.39
						59	Concrete	na	1.03875	0	0	0	0	0.00665365	0.334789	0.185837	1.15061	0.00010875	0.114393	0.362048	0.00150634	0.0400256	0.00186177	0.00887787
					Final Assembly	60	per m3 CE&ICT		2962.25	2.83896	28.3784	0	0	26.1961	1318.1	231.393	811.03	39.2962	7.4515	67.0649	42.8467	903.632	2.07249	34.9531
						61	per m3 appliances		700.101	2.83784	0	0	0	5.50929	277.209	46.6682	150.153	15.7259	1.56712	14.0088	35.7429	3204.06	0.446255	7.35096
						62	per product		51.5	0	0	0	0	1.02073	51.3597	4.5247	12.1612	0.050813	0.290348	2.6179	2.6179	0.256753	0.080242	1.36195
					Distribution & Retail	63	per m3 retail product		499.589	0	0	0	0	6.40444	322.25	29.3139	83.5364	5.02663	1.82175	16.4257	8.50086	214.735	0.503468	8.54535
						64	per m3 installed product		312.173	0	0	0	0	3.50829	176.525	18.6001	49.6497	4.91043	0.997935	8.99782	8.25326	214.017	0.275795	4.68106
						65	per retail product		58.9722	0	0	0	0	1.08878	54.7837	4.02775	12.7394	0.0436835	0.309704	2.79243	0.0930831	0.269827	0.0855915	1.45274
					Use: Energy per MWh Electric	66	Electricity per MWh		9000	9000	0	0	400	142	4638	384.179	1700	201	21	91	21	36	38.7412	1700
						67	Electric, η 96%, per GJ		2604.17	2604.17	0	0	116	41.088	1342.01	111.163	491.898	58.1597	6.07639	26.331	6.07639	10.4167	11.2099	491.898
						68	Elec. GSHP, η 288%, GJ		868.056	868.056	0	0	39	13.696	447.338	37.0543	163.966	19.3866	2.02546	8.77701	2.02546	3.47222	3.73662	163.966
						69	Gas, η 86%, atmospheric		1162.79	0	0	0	0	0	0	64.2879	18.7222	0.846	0	0	0.0325462	0.325	0	0
						70	Gas, η 90%, atmosph.		1111.11	0	0	0	0	0	0	61.4308	17.8903	0.809	0	0	0.0310997	0.311	0	0
						71	Gas, η 101%, condens.		990.099	0	0	-14	0	0	0	54.7403	15.943	0.721	0	0	0.0277126	0.277	0	0
						72	Gas, η 103%, condens.		970.874	0	0	-20	0	0	0	53.6776	15.633	0.706	0	0	0.0271745	0.271	0	0
						73	Oil, η 85%, atmosph.		1176.47	0	0	0	0	0	0	87.762	109.933	1.519	0	0	0.0607893	1.85745	0	0
						74	Oil, η 95%, condens.		1052.63	0	0	-14	0	0	0	78.5236	98.3611	1.36	0	0	0.0543904	1.66193	0	0
						75	Wood pellets, η 85%.		1176.47	0	0	0	0	0	383.348	0.663072	105.238	19.408	1.3889	0	27.9333	19.8973	0	0
						76	Wood pellets, η 88%.		1136.36	0	0	0	0	0	370.279	0.337581	85.9018	9.373	1.3415	0	26.9275	19.2189	0	0
						77	Wood logs, η 67%.		1492.54	0	0	0	0	0	433.976	3.26773	105.145	93.217	1.57	0	33.736	22.8408	0	0
						78	Wood logs, η 74%.		1333.33	0	0	0	0	0	434.658	9.66393	106.151	313.044	1.76	0	43.044	76.7043	0	0
						79	Extra for fossil fuel extraction & transport: Gas +7% (row 68-73) , Oil +10% (row 72-73), for Wood pellets and logs add 5% of row 72
					Use Consumables per KG	80	Toner		50	2	25	4	81	2	158	2	8	0.054	3	13	0	7	1	100
						81	Detergent dishw.		32	0	0	0.761905	0	0.737374	37.1022	1.39646	8.24	0.012052	0.209747	0	0.0630404	0.176	0.206327	53601
						82	Rinsing agent dish		20	0	0	0.47619	0	0.460859	23.1889	0.872789	5.15	0.0075325	0.131092	0	0.0394002	0.11	0.128954	0.614918
						83	Regeneration Salt dishw		1.5	0	0	0.0357143	0	0.0345644	1.73916	0.0654592	0.38625	0.000564938	0.00983188	0	0.00295502	0.00825	0.00967156	0.0461188
						84	Water per m3		6.3	6.3	0	1388	0.28	0.0994	3.2466	0.268925	1.19	0.1407	0.0147	0.0637	0.0147	0.0252	0.0271189	1.19
						85	Vacuum cl. bags	0.5	16.599	0.999	0	0	0	0.0230199	38.6583	0.976096	3.43474	0.000376248	0.00654803	0.0171391	0.00196804	0.0054945	0.00644126	324.254
						86
					Use: Maintenance	87	Mini-van diesel		2.40695	0	0	0	0	0	0	0.186046	0.186	38.9	0	0.52	0.52	8.82	0	0
						88	repair parts		1% of total impact for production and distribution of the product
					Disposal: Env. Costs per kg final product	89	Landfill		68.3235	0	0	0	0	0	225.94	5.1	9.68186	0.283481	8.43419	20	0	88.9543	5.67745	324.58
						90	Dumped Hg		0	0	0	0	0	0	0	0	0	0	0	5000	0	0	0	0
						91	Refrigerant									0
						92	Incinerated		67	0	0	0	0	0	0	5.02	10	0.14	0	18	0	85	5.7	325
						93	Plastics, re-use, recyc.		6.50734	0	0	0	0	0	3.23895	0.444812	1.5155	0.132911	0	1	0	30.3231	0	0
					Disposal: Env Benefits of Re-use	94	Mass fraction available for EoL management (per materials category)= recycmax* (total mass product + auxiliaries incl. refrigerants), with recycmax= 1/(1+r)^L where r=growth rate; L=product stock life. The remainder is the surplus(deficit) ‘in stock’, i.e. in use or stored with users.
						95	Re-use: 75% credit of all impacts, related to re-used mass per materials category
						96	Recycling: 40% credit of all impacts, related to recycled mass per materials category. Exception for ferro and non-ferro metals, where credit is overall 65-80% per metal (fixed), further differentiated per halfproduct and already included in production impact.
						97	Recovery (heat): 30% credit of all impacts, related to heat recovery mass (plastics and others with feedstock energy)
						99	Recyclability: best/>avg/avg (basecase)/<avg/worst (per materials category) with credit on recycled mass +10%/+5%/0/-5%/-10% (also for metals)
						98	Controller board		2239.5	1814.14	0.0690768	421.873	34.2509	97.479	2083.86	125.421	994.054	4.58559	11.0113	427.328	51.2378	821.297	106.403	2040.09
						100	Office paper (from recycled paper)	#REF!	15.1355	3.80676	0	20.463	0	0	0	0.933	2.57	0	0	0	0	2.453	0	0.352
						101	Office paper (from primary cellulose)	#REF!	39.7054	1.8036	0	52.234	0	0.00460768	0.0206184	1.198	9.09	0	0	0	0	8.4465	0	0.741
						102	Platinum	#REF!	1133551	0	0	0	0	0	0	70122.4	3.90157e+06	81975.7	29704	209450	381328	59902.9	529967	39521199
						103	Carbon black particles	#REF!	81.1161	0	0	0	0	0	0	1.84373	9.99728	0.480731	0.353144	5.05852	23.6325	2.60861	25.8403	3507.82
						104	Nafion	#REF!	0	0	0	0	0	0	0	959	0	0	0	0	0	0	0	0
						105	Thermoactive glue	#REF!	71.1989	0	0	0	0	0	0	3.39386	13.344	26.4172	1.11217	19.9226	28.2027	4.0825	34.0149	5902.44
						106	Carbon fibre reinforced plastic	#REF!	1199.39	0	0	0	0	0	0	85.8454	429.67	24.8443	31.8078	170.995	603.783	136.826	689.473	37729.4
						107	Silicone	#REF!	60.9058	0	0	0	0	0	0	2.92778	13.291	2.81809	0.691879	9.46848	15.8545	2.81571	21.531	1602.14
						108	BoP	#REF!	0	0	0	0	0	0	0	7.02749	23.1808	0	0	0	0	0	0	0
						109	Aux. Battery	#REF!	283.92	0	0	0	0	0	0	13.26	164.58	235.56	8.58	46.02	30.42	15.6	34.32	5.46
						110	0	#REF!	0	0	0	0	0	0	0	0	0	0	0	0	0	0	0	0
						111	0	#REF!	0	0	0	0	0	0	0	0	0	0	0	0	0	0	0	0
						112	0	#REF!	0	0	0	0	0	0	0	0	0	0	0	0	0	0	0	0
						113	0	#REF!	0	0	0	0	0	0	0	0	0	0	0	0	0	0	0	0
						114	0	#REF!	0	0	0	0	0	0	0	0	0	0	0	0	0	0	0	0
						115	0	#REF!	0	0	0	0	0	0	0	0	0	0	0	0	0	0	0	0
						116	0	#REF!	0	0	0	0	0	0	0	0	0	0	0	0	0	0	0	0
						117	0	#REF!	0	0	0	0	0	0	0	0	0	0	0	0	0	0	0	0
						118	0	#REF!	0	0	0	0	0	0	0	0	0	0	0	0	0	0	0	0
						119	0	#REF!	0	0	0	0	0	0	0	0	0	0	0	0	0	0	0	0
						120	0	#REF!	0	0	0	0	0	0	0	0	0	0	0	0	0	0	0	0
						121	Hydrogen (RED II Threshold)	#REF!	0	0	0	0	0	0	0	3.384	0	0	0	0	0	0	0	0
						122	0	#REF!	0	0	0	0	0	0	0	0	0	0	0	0	0	0	0	0
						123	0	#REF!	0	0	0	0	0	0	0	0	0	0	0	0	0	0	0	0
						124	0	#REF!	0	0	0	0	0	0	0	0	0	0	0	0	0	0	0	0
						125	0	#REF!	0	0	0	0	0	0	0	0	0	0	0	0	0	0	0	0
						126
						127
						128
						129
						130
						131
						132
						133
						134
						135
						136
						137
						138
						139
						140
						141
						142
						143
						144
						145
						146
						147
						148
						149
						150
						151
						152
						153
						154
						155
						156
						157
						158
						159
						160
						161
						162
						163
						164
						165
						166
						167
						168
						169
						170
						171
						172
						173
						174
						175
						176
						177
						178
						179
						180
						181
						182
						183
						184
						185
						186
						187
						188
						189
						190
						191
						192
						193
						194
						195
						196
						197
						198
						199
						200

## Sheet: Data3
							Mat
							29 -Cu winding wire
							30 -Cu wire
							31 -Cu tube/sheet
							32 -CuZn38 cast
							Mat
							26 -Stainless 18/8 coil
							44 -CRT per m2 scrn
							56 -Bitumen
			conditions for DSUM -->			Cat	Mat
						1-BlkPlastics	91 -Refrigerant
						Cat	Mat
						2-TecPlastics	24 -Cast iron
						Cat	32 -CuZn38 cast
						3-Ferro	33 -ZnAl4 cast
						Cat	Mat
						4-Non-ferro	28 -Al diecast																		TOTAL avg. controller board		2239.5	1814.14	0.0690768	421.873	34.2509	97.479	2083.86	125.421	994.054	4.58559	11.0113	427.328	51.2378	821.297	106.403	2040.09
						Cat	34 -MgZn5 cast																				72.69	7.26	52.72	4.8	40	4.428	28.137	1.97451	17.7684	2e-05	0	1.86	0.75	0.016	0.157558
						5-coating	Mat																		avg controller
						Cat	31 -Cu tube/sheet																		0.35	PWB	1039.1	1009.95	0	323.903	0	45.7397	990.823	58.4511	567.165	2.61839	5.24518	147.604	1.58309	17.7888	5.15966	768.424
						6-Electronics	27 -Al sheet/extrusion																		0.24	port	91.9882	0	0	8.31732	13.2	4.70462	144.129	5.20095	34.0366	0.0298225	0.519014	1.83849	49.116	8.54751	17.8142	1.71313
						Cat	26 -Stainless 18/8 coil																		0.28	caps	887.203	596.577	0	81.2605	0	13.7917	691.138	47.9743	301.452	0.22441	3.90552	261.277	0	791.848	3.89582	202.574
						7-Misc.	22 -St sheet galv.																		0.08	largeIC	14.9654	4.74483	0	5.97254	20.4288	1.3678	24.6131	0.802039	14.749	0.00118303	0.111669	3.03992	0.154293	1.0366	2.54409	517.578
						Cat	25 -Ferrite																		0.02	smallIC	160.438	159.016	0	0	0	4.73377	175.776	10.1083	55.7468	1.38012	0.976738	8.93155	0.293879	1.45709	74.8	429.622
			ERROR-CHECKED TABLE FROM Uitrekensheet			8-Extra	Mat																		0.024	SMD/ LED's avg.	42.8815	41.8596	0	0	0	1.60631	43.3772	2.7627	19.5885	0.331266	0.235045	4.44022	0.0708336	0.579728	0.231212	103.112
							43 -LCD per m2 scrn	weight	GER	electr	feedst	water (proces)	water (cool)	haz. Waste	non-haz. Waste	GWP	AD	VOC	POP	HM	PAH	PM	Metal	EUP	0.006	solder	2.92734	1.99755	0.0690768	2.41993	0.62208	25.5351	14.008	0.121262	1.31636	0.000397936	0.0181035	0.196821	0.0196831	0.0384977	1.95831	17.0705
							44 -CRT per m2 scrn		MJ	MJ	MJ	ltr.	ltr.	g	g	kg CO2eq	g SO2eq	mg	ng i-Teq	mg Ni eq	mg Ni eq	g	mg Hg/20eq	mg PO4 eq
							Mat
							98 -controller board																				PWB	ext. ports	caps &coils	largeIC	smallIC	SMD/ LED's avg.	solder
																											0.35	0.24	0.28	0.08	0.02	0.024	0.006
			1	Platinum	76	8-Extra	102-Platinum	76	86149.9	0	0	0	0	0	0	5329.3	296519	6230.15	2257.5	15918.2	28980.9	4552.62	40277.5	3.00361e+06
			2	Carbon black particles	2342.45	8-Extra	103-Carbon black particles	2342.45	190.01	0	0	0	0	0	0	4.31884	23.4181	1.12609	0.827222	11.8493	55.3579	6.11054	60.5296	8216.9
			3	Nafion	682.4	8-Extra	104-Nafion	682.4	0	0	0	0	0	0	0	654.422	0	0	0	0	0	0	0	0
			4	PET	22475.4	1-BlkPlastics	10 -PET	22475.4	1771.06	300.496	872.72	164.07	809.114	35.9606	2071.06	69.8855	772.471	29.218	0	50.9338	32.6343	112.377	0.0449508	8546.54
			5	Thermoactive glue	5620.85	8-Extra	105-Thermoactivable glue	5620.85	400.199	0	0	0	0	0	0	19.0764	75.0044	148.487	6.25133	111.982	158.523	22.9471	191.193	33176.7
			6	GDL (Carbon fibre+PTFE)	3495.75	8-Extra	106-Carbon fibre reinforced plastic	3495.75	4192.78	0	0	0	0	0	0	300.094	1502.02	86.8494	111.192	597.757	2110.67	478.308	2410.23	131893
			7	Stainless steel	85589.1	3-Ferro	26 -Stainless 18/8 coil	85589.1	5310.12	829.443	346.208	6482.09	721.944	0	85589.1	531.096	4794.78	11.6401	659.036	12693.3	2.41858	677.352	7392.11	199245
			8	Silicone	19791.7	8-Extra	107-Silicone	19791.7	1205.43	0	0	0	0	0	0	57.9455	263.05	55.7747	13.6934	187.397	313.787	55.7275	426.134	31709
			9	Glass-reinforced thermoplastic	3800	2-TecPlastics	19 -E-glass fibre	3800	250.146	80.1341	41.018	206.338	1030.96	26.8019	1182.63	12.7539	110.883	0.0176232	0	0	0.246431	30.9507	179.9	11975.2
			10	Copper	3760.4	4-Non-ferro	30 -Cu wire	3760.4	438.275	0	0	0	0	0.909832	45.7797	23.3272	1098.43	0.0361922	14.0783	207.046	20.2305	10.6805	353.833	581.058
			11	Steel	14535	3-Ferro	23 -St tube/profile	14535	240.777	66.4606	-2.28942	0	0	0	11638	19.9925	52.2278	1.70549	174.42	37.5924	0.473286	14.5838	22.7918	557.137
			12	0	0	0	0	0	0	0	0	0	0	0	0	0	0	0	0	0	0	0	0	0
			13	BoP	130625	8-Extra	108-BoP	130625	0	0	0	0	0	0	0	917.965	3028	0	0	0	0	0	0	0
			14	0	0	0	0	0	0	0	0	0	0	0	0	0	0	0	0	0	0	0	0	0
			15	Tank	175000	8-Extra	106-Carbon fibre reinforced plastic	175000	209894	0	0	0	0	0	0	15022.9	75192.3	4347.75	5566.36	29924.2	105662	23944.5	120658	6.60265e+06
			16	0	0	0	0	0	0	0	0	0	0	0	0	0	0	0	0	0	0	0	0	0
			17	Aux. Battery	278618	8-Extra	109-Aux. Battery	278618	79105.1	0	0	0	0	0	0	3694.47	45854.9	65631.1	2390.54	12822	8475.54	4346.43	9562.15	1521.25
			18	0	0	0	0	0	0	0	0	0	0	0	0	0	0	0	0	0	0	0	0	0
			19	0	0	0	0	0	0	0	0	0	0	0	0	0	0	0	0	0	0	0	0	0
			20	0	0	0	0	0	0	0	0	0	0	0	0	0	0	0	0	0	0	0	0	0
			21	0	0	0	0	0	0	0	0	0	0	0	0	0	0	0	0	0	0	0	0	0
			22	0	0	0	0	0	0	0	0	0	0	0	0	0	0	0	0	0	0	0	0	0
			23	0	0	0	0	0	0	0	0	0	0	0	0	0	0	0	0	0	0	0	0	0
			24	0	0	0	0	0	0	0	0	0	0	0	0	0	0	0	0	0	0	0	0	0
			25	0	0	0	0	0	0	0	0	0	0	0	0	0	0	0	0	0	0	0	0	0
			26	0	0	0	0	0	0	0	0	0	0	0	0	0	0	0	0	0	0	0	0	0
			27	0	0	0	0	0	0	0	0	0	0	0	0	0	0	0	0	0	0	0	0	0
			28	0	0	0	0	0	0	0	0	0	0	0	0	0	0	0	0	0	0	0	0	0
			29	0	0	0	0	0	0	0	0	0	0	0	0	0	0	0	0	0	0	0	0	0
			30	0	0	0	0	0	0	0	0	0	0	0	0	0	0	0	0	0	0	0	0	0
			31	0	0	0	0	0	0	0	0	0	0	0	0	0	0	0	0	0	0	0	0	0
			32	0	0	0	0	0	0	0	0	0	0	0	0	0	0	0	0	0	0	0	0	0
			33	0	0	0	0	0	0	0	0	0	0	0	0	0	0	0	0	0	0	0	0	0
			34	0	0	0	0	0	0	0	0	0	0	0	0	0	0	0	0	0	0	0	0	0
			35	0	0	0	0	0	0	0	0	0	0	0	0	0	0	0	0	0	0	0	0	0
			36	0	0	0	0	0	0	0	0	0	0	0	0	0	0	0	0	0	0	0	0	0
			37	0	0	0	0	0	0	0	0	0	0	0	0	0	0	0	0	0	0	0	0	0
			38	0	0	0	0	0	0	0	0	0	0	0	0	0	0	0	0	0	0	0	0	0
			39	0	0	0	0	0	0	0	0	0	0	0	0	0	0	0	0	0	0	0	0	0
			40	0	0	0	0	0	0	0	0	0	0	0	0	0	0	0	0	0	0	0	0	0
								0
								0
								0
			41	0	0	0	0	0	0	0	0	0	0	0	0	0	0	0	0	0	0	0	0	0
			42	0	0	0	0	0	0	0	0	0	0	0	0	0	0	0	0	0	0	0	0	0
			43	0	0	0	0	0	0	0	0	0	0	0	0	0	0	0	0	0	0	0	0	0
			44	0	0	0	0	0	0	0	0	0	0	0	0	0	0	0	0	0	0	0	0	0
			45	0	0	0	0	0	0	0	0	0	0	0	0	0	0	0	0	0	0	0	0	0
			46	0	0	0	0	0	0	0	0	0	0	0	0	0	0	0	0	0	0	0	0	0
			47	0	0	0	0	0	0	0	0	0	0	0	0	0	0	0	0	0	0	0	0	0
			48	0	0	0	0	0	0	0	0	0	0	0	0	0	0	0	0	0	0	0	0	0
			49	0	0	0	0	0	0	0	0	0	0	0	0	0	0	0	0	0	0	0	0	0
			50	0	0	0	0	0	0	0	0	0	0	0	0	0	0	0	0	0	0	0	0	0
			51	0	0	0	0	0	0	0	0	0	0	0	0	0	0	0	0	0	0	0	0	0
			52	0	0	0	0	0	0	0	0	0	0	0	0	0	0	0	0	0	0	0	0	0
			53	0	0	0	0	0	0	0	0	0	0	0	0	0	0	0	0	0	0	0	0	0
			54	0	0	0	0	0	0	0	0	0	0	0	0	0	0	0	0	0	0	0	0	0
			55	0	0	0	0	0	0	0	0	0	0	0	0	0	0	0	0	0	0	0	0	0
			56	0	0	0	0	0	0	0	0	0	0	0	0	0	0	0	0	0	0	0	0	0
			57	0	0	0	0	0	0	0	0	0	0	0	0	0	0	0	0	0	0	0	0	0
			58	0	0	0	0	0	0	0	0	0	0	0	0	0	0	0	0	0	0	0	0	0
			59	0	0	0	0	0	0	0	0	0	0	0	0	0	0	0	0	0	0	0	0	0
			60	0	0	0	0	0	0	0	0	0	0	0	0	0	0	0	0	0	0	0	0	0
			61	0	0	0	0	0	0	0	0	0	0	0	0	0	0	0	0	0	0	0	0	0
			62	0	0	0	0	0	0	0	0	0	0	0	0	0	0	0	0	0	0	0	0	0
			63	0	0	0	0	0	0	0	0	0	0	0	0	0	0	0	0	0	0	0	0	0
			64	0	0	0	0	0	0	0	0	0	0	0	0	0	0	0	0	0	0	0	0	0
			65	0	0	0	0	0	0	0	0	0	0	0	0	0	0	0	0	0	0	0	0	0
			66	0	0	0	0	0	0	0	0	0	0	0	0	0	0	0	0	0	0	0	0	0
			67	0	0	0	0	0	0	0	0	0	0	0	0	0	0	0	0	0	0	0	0	0
			68	0	0	0	0	0	0	0	0	0	0	0	0	0	0	0	0	0	0	0	0	0
			69	0	0	0	0	0	0	0	0	0	0	0	0	0	0	0	0	0	0	0	0	0
			70	0	0	0	0	0	0	0	0	0	0	0	0	0	0	0	0	0	0	0	0	0
			71	0	0	0	0	0	0	0	0	0	0	0	0	0	0	0	0	0	0	0	0	0
			72	0	0	0	0	0	0	0	0	0	0	0	0	0	0	0	0	0	0	0	0	0
			73	0	0	0	0	0	0	0	0	0	0	0	0	0	0	0	0	0	0	0	0	0
			74	0	0	0	0	0	0	0	0	0	0	0	0	0	0	0	0	0	0	0	0	0
			75	0	0	0	0	0	0	0	0	0	0	0	0	0	0	0	0	0	0	0	0	0
			76	0	0	0	0	0	0	0	0	0	0	0	0	0	0	0	0	0	0	0	0	0
			77	0	0	0	0	0	0	0	0	0	0	0	0	0	0	0	0	0	0	0	0	0
			78	0	0	0	0	0	0	0	0	0	0	0	0	0	0	0	0	0	0	0	0	0
			79	0	0	0	0	0	0	0	0	0	0	0	0	0	0	0	0	0	0	0	0	0
			80	0	0	0	0	0	0	0	0	0	0	0	0	0	0	0	0	0	0	0	0	0
			81	0	0	0	0	0	0	0	0	0	0	0	0	0	0	0	0	0	0	0	0	0
			82	0	0	0	0	0	0	0	0	0	0	0	0	0	0	0	0	0	0	0	0	0
			83	0	0	0	0	0	0	0	0	0	0	0	0	0	0	0	0	0	0	0	0	0
			84	0	0	0	0	0	0	0	0	0	0	0	0	0	0	0	0	0	0	0	0	0
			85	0	0	0	0	0	0	0	0	0	0	0	0	0	0	0	0	0	0	0	0	0
			86	0	0	0	0	0	0	0	0	0	0	0	0	0	0	0	0	0	0	0	0	0
			87	0	0	0	0	0	0	0	0	0	0	0	0	0	0	0	0	0	0	0	0	0
								0
								0
								0
			88	0	0	0	0	0	0	0	0	0	0	0	0	0	0	0	0	0	0	0	0	0
			89	0	0	0	0	0	0	0	0	0	0	0	0	0	0	0	0	0	0	0	0	0
			90	0	0	0	0	0	0	0	0	0	0	0	0	0	0	0	0	0	0	0	0	0
			91	0	0	0	0	0	0	0	0	0	0	0	0	0	0	0	0	0	0	0	0	0
			92	0	0	0	0	0	0	0	0	0	0	0	0	0	0	0	0	0	0	0	0	0
			93	0	0	0	0	0	0	0	0	0	0	0	0	0	0	0	0	0	0	0	0	0
			94	0	0	0	0	0	0	0	0	0	0	0	0	0	0	0	0	0	0	0	0	0
			95	0	0	0	0	0	0	0	0	0	0	0	0	0	0	0	0	0	0	0	0	0
			96	0	0	0	0	0	0	0	0	0	0	0	0	0	0	0	0	0	0	0	0	0
			97	0	0	0	0	0	0	0	0	0	0	0	0	0	0	0	0	0	0	0	0	0
			98	0	0	0	0	0	0	0	0	0	0	0	0	0	0	0	0	0	0	0	0	0
			99	0	0	0	0	0	0	0	0	0	0	0	0	0	0	0	0	0	0	0	0	0
			100	0	0	0	0	0	0	0	0	0	0	0	0	0	0	0	0	0	0	0	0	0
			101	0	0	0	0	0	0	0	0	0	0	0	0	0	0	0	0	0	0	0	0	0
			102	0	0	0	0	0	0	0	0	0	0	0	0	0	0	0	0	0	0	0	0	0
			103	0	0	0	0	0	0	0	0	0	0	0	0	0	0	0	0	0	0	0	0	0
			104	0	0	0	0	0	0	0	0	0	0	0	0	0	0	0	0	0	0	0	0	0
			105	0	0	0	0	0	0	0	0	0	0	0	0	0	0	0	0	0	0	0	0	0
			106	0	0	0	0	0	0	0	0	0	0	0	0	0	0	0	0	0	0	0	0	0
			107	0	0	0	0	0	0	0	0	0	0	0	0	0	0	0	0	0	0	0	0	0
			108	0	0	0	0	0	0	0	0	0	0	0	0	0	0	0	0	0	0	0	0	0
			109	0	0	0	0	0	0	0	0	0	0	0	0	0	0	0	0	0	0	0	0	0
			110	0	0	0	0	0	0	0	0	0	0	0	0	0	0	0	0	0	0	0	0	0
			111	0	0	0	0	0	0	0	0	0	0	0	0	0	0	0	0	0	0	0	0	0
			112	0	0	0	0	0	0	0	0	0	0	0	0	0	0	0	0	0	0	0	0	0
			113	0	0	0	0	0	0	0	0	0	0	0	0	0	0	0	0	0	0	0	0	0
			114	0	0	0	0	0	0	0	0	0	0	0	0	0	0	0	0	0	0	0	0	0
			115	0	0	0	0	0	0	0	0	0	0	0	0	0	0	0	0	0	0	0	0	0
			116	0	0	0	0	0	0	0	0	0	0	0	0	0	0	0	0	0	0	0	0	0
			117	0	0	0	0	0	0	0	0	0	0	0	0	0	0	0	0	0	0	0	0	0
			118	0	0	0	0	0	0	0	0	0	0	0	0	0	0	0	0	0	0	0	0	0
			119	0	0	0	0	0	0	0	0	0	0	0	0	0	0	0	0	0	0	0	0	0
			120	0	0	0	0	0	0	0	0	0	0	0	0	0	0	0	0	0	0	0	0	0
			121	0	0	0	0	0	0	0	0	0	0	0	0	0	0	0	0	0	0	0	0	0
			122	0	0	0	0	0	0	0	0	0	0	0	0	0	0	0	0	0	0	0	0	0
			123	0	0	0	0	0	0	0	0	0	0	0	0	0	0	0	0	0	0	0	0	0
			124	0	0	0	0	0	0	0	0	0	0	0	0	0	0	0	0	0	0	0	0	0
			125	0	0	0	0	0	0	0	0	0	0	0	0	0	0	0	0	0	0	0	0	0
			126	0	0	0	0	0	0	0	0	0	0	0	0	0	0	0	0	0	0	0	0	0
			127	0	0	0	0	0	0	0	0	0	0	0	0	0	0	0	0	0	0	0	0	0
			128	0	0	0	0	0	0	0	0	0	0	0	0	0	0	0	0	0	0	0	0	0
			129	0	0	0	0	0	0	0	0	0	0	0	0	0	0	0	0	0	0	0	0	0
			130	0	0	0	0	0	0	0	0	0	0	0	0	0	0	0	0	0	0	0	0	0
			131	0	0	0	0	0	0	0	0	0	0	0	0	0	0	0	0	0	0	0	0	0
			132	0	0	0	0	0	0	0	0	0	0	0	0	0	0	0	0	0	0	0	0	0
			133	0	0	0	0	0	0	0	0	0	0	0	0	0	0	0	0	0	0	0	0	0
			134	0	0	0	0	0	0	0	0	0	0	0	0	0	0	0	0	0	0	0	0	0
								0
								0
								0
			135	0	0	0	0	0	0	0	0	0	0	0	0	0	0	0	0	0	0	0	0	0
			136	0	0	0	0	0	0	0	0	0	0	0	0	0	0	0	0	0	0	0	0	0
			137	0	0	0	0	0	0	0	0	0	0	0	0	0	0	0	0	0	0	0	0	0
			138	0	0	0	0	0	0	0	0	0	0	0	0	0	0	0	0	0	0	0	0	0
			139	0	0	0	0	0	0	0	0	0	0	0	0	0	0	0	0	0	0	0	0	0
			140	0	0	0	0	0	0	0	0	0	0	0	0	0	0	0	0	0	0	0	0	0
			141	0	0	0	0	0	0	0	0	0	0	0	0	0	0	0	0	0	0	0	0	0
			142	0	0	0	0	0	0	0	0	0	0	0	0	0	0	0	0	0	0	0	0	0
			143	0	0	0	0	0	0	0	0	0	0	0	0	0	0	0	0	0	0	0	0	0
			144	0	0	0	0	0	0	0	0	0	0	0	0	0	0	0	0	0	0	0	0	0
			145	0	0	0	0	0	0	0	0	0	0	0	0	0	0	0	0	0	0	0	0	0
			146	0	0	0	0	0	0	0	0	0	0	0	0	0	0	0	0	0	0	0	0	0
			147	0	0	0	0	0	0	0	0	0	0	0	0	0	0	0	0	0	0	0	0	0
			148	0	0	0	0	0	0	0	0	0	0	0	0	0	0	0	0	0	0	0	0	0
			149	0	0	0	0	0	0	0	0	0	0	0	0	0	0	0	0	0	0	0	0	0
			150	0	0	0	0	0	0	0	0	0	0	0	0	0	0	0	0	0	0	0	0	0
			151	0	0	0	0	0	0	0	0	0	0	0	0	0	0	0	0	0	0	0	0	0
			152	0	0	0	0	0	0	0	0	0	0	0	0	0	0	0	0	0	0	0	0	0
			153	0	0	0	0	0	0	0	0	0	0	0	0	0	0	0	0	0	0	0	0	0
			154	0	0	0	0	0	0	0	0	0	0	0	0	0	0	0	0	0	0	0	0	0
			155	0	0	0	0	0	0	0	0	0	0	0	0	0	0	0	0	0	0	0	0	0
			156	0	0	0	0	0	0	0	0	0	0	0	0	0	0	0	0	0	0	0	0	0
			157	0	0	0	0	0	0	0	0	0	0	0	0	0	0	0	0	0	0	0	0	0
			158	0	0	0	0	0	0	0	0	0	0	0	0	0	0	0	0	0	0	0	0	0
			159	0	0	0	0	0	0	0	0	0	0	0	0	0	0	0	0	0	0	0	0	0
			160	0	0	0	0	0	0	0	0	0	0	0	0	0	0	0	0	0	0	0	0	0
			161	0	0	0	0	0	0	0	0	0	0	0	0	0	0	0	0	0	0	0	0	0
			162	0	0	0	0	0	0	0	0	0	0	0	0	0	0	0	0	0	0	0	0	0
			163	0	0	0	0	0	0	0	0	0	0	0	0	0	0	0	0	0	0	0	0	0
			164	0	0	0	0	0	0	0	0	0	0	0	0	0	0	0	0	0	0	0	0	0
			165	0	0	0	0	0	0	0	0	0	0	0	0	0	0	0	0	0	0	0	0	0
			166	0	0	0	0	0	0	0	0	0	0	0	0	0	0	0	0	0	0	0	0	0
			167	0	0	0	0	0	0	0	0	0	0	0	0	0	0	0	0	0	0	0	0	0
			168	0	0	0	0	0	0	0	0	0	0	0	0	0	0	0	0	0	0	0	0	0
			169	0	0	0	0	0	0	0	0	0	0	0	0	0	0	0	0	0	0	0	0	0
			170	0	0	0	0	0	0	0	0	0	0	0	0	0	0	0	0	0	0	0	0	0
			171	0	0	0	0	0	0	0	0	0	0	0	0	0	0	0	0	0	0	0	0	0
			172	0	0	0	0	0	0	0	0	0	0	0	0	0	0	0	0	0	0	0	0	0
			173	0	0	0	0	0	0	0	0	0	0	0	0	0	0	0	0	0	0	0	0	0
			174	0	0	0	0	0	0	0	0	0	0	0	0	0	0	0	0	0	0	0	0	0
			175	0	0	0	0	0	0	0	0	0	0	0	0	0	0	0	0	0	0	0	0	0
			176	0	0	0	0	0	0	0	0	0	0	0	0	0	0	0	0	0	0	0	0	0
			177	0	0	0	0	0	0	0	0	0	0	0	0	0	0	0	0	0	0	0	0	0
			178	0	0	0	0	0	0	0	0	0	0	0	0	0	0	0	0	0	0	0	0	0
			179	0	0	0	0	0	0	0	0	0	0	0	0	0	0	0	0	0	0	0	0	0
			180	0	0	0	0	0	0	0	0	0	0	0	0	0	0	0	0	0	0	0	0	0
			181	0	0	0	0	0	0	0	0	0	0	0	0	0	0	0	0	0	0	0	0	0
								0
								0
								0
			182	0	0	0	0	0	0	0	0	0	0	0	0	0	0	0	0	0	0	0	0	0
			183	0	0	0	0	0	0	0	0	0	0	0	0	0	0	0	0	0	0	0	0	0
			184	0	0	0	0	0	0	0	0	0	0	0	0	0	0	0	0	0	0	0	0	0
			185	0	0	0	0	0	0	0	0	0	0	0	0	0	0	0	0	0	0	0	0	0
			186	0	0	0	0	0	0	0	0	0	0	0	0	0	0	0	0	0	0	0	0	0
			187	0	0	0	0	0	0	0	0	0	0	0	0	0	0	0	0	0	0	0	0	0
			188	0	0	0	0	0	0	0	0	0	0	0	0	0	0	0	0	0	0	0	0	0
			189	0	0	0	0	0	0	0	0	0	0	0	0	0	0	0	0	0	0	0	0	0
			190	0	0	0	0	0	0	0	0	0	0	0	0	0	0	0	0	0	0	0	0	0
			191	0	0	0	0	0	0	0	0	0	0	0	0	0	0	0	0	0	0	0	0	0
			192	0	0	0	0	0	0	0	0	0	0	0	0	0	0	0	0	0	0	0	0	0
			193	0	0	0	0	0	0	0	0	0	0	0	0	0	0	0	0	0	0	0	0	0
			194	0	0	0	0	0	0	0	0	0	0	0	0	0	0	0	0	0	0	0	0	0
			195	0	0	0	0	0	0	0	0	0	0	0	0	0	0	0	0	0	0	0	0	0
			196	0	0	0	0	0	0	0	0	0	0	0	0	0	0	0	0	0	0	0	0	0
			197	0	0	0	0	0	0	0	0	0	0	0	0	0	0	0	0	0	0	0	0	0
			198	0	0	0	0	0	0	0	0	0	0	0	0	0	0	0	0	0	0	0	0	0
			199	0	0	0	0	0	0	0	0	0	0	0	0	0	0	0	0	0	0	0	0	0
			200	0	0	0	0	0	0	0	0	0	0	0	0	0	0	0	0	0	0	0	0	0
								0
			Totals PRODUCTION		746411			746411	389148	1276.53	1257.66	6852.5	2562.01	63.6724	100526	26657.6	429287	76543.9	11193.9	72562.2	145813	34252.6	181534	1.00337e+07
			MANUFACTURING					weight	GER	electr	feedst	water (proces)	water (cool)	haz. Waste	non-haz. Waste	GWP	AD	VOC	POP	HM	PAH	PM	Metal	EUP
			Totals						2624.54	1530.81	82.023	21.4508	672.511	1.29427	11275.9	148.529	643.351	2.03363	230.389	534.932	0.894163	98.402	17.3265	1141.91
			DISTRIBUTION
			Totals						712.604	1.42433	0	0	0	8.08908	407.015	46.6883	142.191	10.5103	2.30095	20.6856	24.9172	1716.44	0.642505	10.7931
			USE PHASE
			Energy						0	0	0	0	0	0	0	0	0	0	0	0	0	0	0	0
			Consumables		46500000			46500000	668670	0	0	0	0	0	0	157356	465	0	0	0	0	0	0	0
			of which
			- water (in m3)		0				0	0	0	0	0	0	0	0	0	0	0	0	0	0	0	0
			- refrigerants, weight in g		0			0	0	0	0	0	0	0	0	0	0	0	0	0	0	0	0	0
			- auxiliaries, weight in g		46500000			46500000	668670	0	0	0	0	0	0	157356	465	0	0	0	0	0	0	0
			Maintenance		7464.11			7464.11	3891.48	12.7653	12.5766	68.525	25.6201	0.636724	1005.26	266.576	4299.3	765.439	111.939	725.622	1458.13	342.526	1815.34	100337
			Totals USE PHASE		4.65075e+07			4.65075e+07	672561	12.7653	12.5766	68.525	25.6201	0.636724	1005.26	157623	4764.3	765.439	111.939	725.622	1458.13	342.526	1815.34	100337
							column nr.	9	10	11	12	13	14	15	16	17	18	19	20	21	22	23	24	25
							row	3	4	5	6	7	8	9	10	11	12	13	14	15	16	17	18	19
																		calculation HMa subtotals for external damages LCC
							Calculating impacts per materials fraction												CRT,bitumen,stainless	829.443
																			electricity & copper	0
					mass ratio			weight	GER	electr	feedst	water (proces)	water (cool)	haz. Waste	non-haz. Waste	GWP	AP	VOC	POP	HMa	PAH	PM	HMw	EUP
								g	MJ	MJ	MJ	ltr.	ltr.	g	g	kg CO2eq	g SO2eq	mg	ng i-Teq	mg Ni eq	mg Ni eq	g	mg Hg/20eq	mg PO4 eq
					0.000475631	1	Bulk Plastics	22475.4	1771.06	300.496	872.72	164.07	809.114	35.9606	2071.06	69.8855	772.471	29.218	0	50.9338	32.6343	112.377	0.0449508	8546.54
					8.04167e-05	2	TecPlastics	3800	250.146	80.1341	41.018	206.338	1030.96	26.8019	1182.63	12.7539	110.883	0.0176232	0	0	0.246431	30.9507	179.9	11975.2
					0.00211885	3	Ferro	100124	5550.89	895.904	343.918	6482.09	721.944	0	97227	551.088	4847	13.3456	833.456	12730.9	2.89186	691.936	7414.9	199802
					7.95787e-05	4	Non-ferro	3760.4	438.275	0	0	0	0	0.909832	45.7797	23.3272	1098.43	0.0361922	14.0783	207.046	20.2305	10.6805	353.833	581.058
					0	5	Coating	0	0	0	0	0	0	0	0	0	0	0	0	0	0	0	0	0
					0	6	Electronics	0	0	0	0	0	0	0	0	0	0	0	0	0	0	0	0	0
					0	7	Misc.	0	0	0	0	0	0	0	0	0	0	0	0	0	0	0	0	0
					0	7a	Misc. excl. refrigerant	0	0	0	0	0	0	0	0	0	0	0	0	0	0	0	0	0
					0	7b	Refrigerant	0	0	0	0	0	0	0	0	0	0	0	0	0	0	0	0	0
					0.0130413	8	Extra	616252	381137	0	0	0	0	0	0	26000.5	422458	76501.3	10346.4	59573.4	145757	33406.6	173586	9.81278e+06
					0.984046	9a	Aux (incl. water except weight)	46500000	668670	0	0	0	0	0	0	157356	465	0	0	0	0	0	0	0
					0	9b	Refrigerant refill	0	0	0	0	0	0	0	0	0	0	0	0	0	0	0	0	0
					0.000157958	10	Maintenance	7464.11	3891.48	12.7653	12.5766	68.525	25.6201	0.636724	1005.26	266.576	4299.3	765.439	111.939	725.622	1458.13	342.526	1815.34	100337
							TOTAL	4.72539e+07	1.05782e+06	1276.53	1257.66	6852.5	2562.01	63.6724	100526	184014	429752	76543.9	11193.9	72562.2	145813	34252.6	181534	1.00337e+07
					1		of which refrigant total	0	0	0	0	0	0	0	0	0	0	0	0	0	0	0	0	0
			1 mg Hg= 5 mg Ni eq. (HMa)				of which mercury total	0	0	0	0	0	0	0	0	0	0	0	0	0	0	0	0	0
							Subtotals needed for MANUFACTURING
							Fe/Cu/Zn foundries	0	0	0	0	0	0	0	0	0	0	0	0	0	0	0	0	0
							Al/Mg foundries	0	0	0	0	0	0	0	0	0	0	0	0	0	0	0	0	0
							sheetmetal	85589.1	5310.12	829.443	346.208	6482.09	721.944	0	85589.1	531.096	4794.78	11.6401	659.036	12693.3	2.41858	677.352	7392.11	199245
							tube & wire	18295.4	679.051	66.4606	-2.28942	0	0	0.909832	11683.7	43.3197	1150.65	1.74169	188.498	244.638	20.7038	25.2643	376.624	1138.2
							Controller board	0	0	0	0	0	0	0	0	0	0	0	0	0	0	0	0	0
							Displays	0	0	0	0	0	0	0	0	0	0	0	0	0	0	0	0	0
							PWB assembly	0	0	0	0	0	0	0	0	0	0	0	0	0	0	0	0	0
							Impacts End-of-Life
			recyclability	credit	from input	1	Bulk Plastics	0.125
				0.75	1	263	Re-use	0.09375	-166.037	-28.1715	-81.8175	-15.3816	-75.8545	-3.37131	-194.162	-6.55176	-72.4191	-2.73919	0	-4.77504	-3.05946	-10.5353	-0.00421414	-801.238
			0	0.4	0	264	Recycle	0	0	0	0	0	0	0	0	0	0	0	0	0	0	0	0	0
				0.3	0	265	Recover	0	0	0	0	0	0	0	0	0	0	0	0	0	0	0	0	0
				92	0	266	Incinerate	0	0	0	0	0	0	0	0	0	0	0	0	0	0	0	0	0
				89	0	267+268+269	Landfill + unaccounted	0	0	0	0	0	0	0	0	0	0	0	0	0	0	0	0	0
						270	TOTAL		-166.037	-28.1715	-81.8175	-15.3816	-75.8545	-3.37131	-194.162	-6.55176	-72.4191	-2.73919	0	-4.77504	-3.05946	-10.5353	-0.00421414	-801.238
			recyclability	credit	from input	2	TecPlastics	0.125
				0.75	0	263	Re-use	0	0	0	0	0	0	0	0	0	0	0	0	0	0	0	0	0
			0	0.4	1	264	Recycle	0.05	-12.5073	-4.00671	-2.0509	-10.3169	-51.5478	-1.3401	-59.1314	-0.637696	-5.54414	-0.000881159	0	0	-0.0123215	-1.54754	-8.99499	-598.762
				0.3	0	265	Recover	0	0	0	0	0	0	0	0	0	0	0	0	0	0	0	0	0
				92	0	266	Incinerate	0	0	0	0	0	0	0	0	0	0	0	0	0	0	0	0	0
				89	0	267+268+269	Landfill + unaccounted	0	0	0	0	0	0	0	0	0	0	0	0	0	0	0	0	0
						270	TOTAL		-12.5073	-4.00671	-2.0509	-10.3169	-51.5478	-1.3401	-59.1314	-0.637696	-5.54414	-0.000881159	0	0	-0.0123215	-1.54754	-8.99499	-598.762
			recyclability	credit	from input	3	Ferro	0.125
				0.75	1	263	Re-use	0.09375	-520.396	-83.991	-32.2423	-607.696	-67.6822	0	-9115.03	-51.6645	-454.407	-1.25115	-78.1365	-1193.52	-0.271112	-64.869	-695.147	-18731.5
			0	0.4	0	264	Recycle	0	0	0	0	0	0	0	0	0	0	0	0	0	0	0	0	0
			Recycling credits at 94% already	0	0	265	Recover	0	0	0	0	0	0	0	0	0	0	0	0	0	0	0	0	0
			deducted from PRODUCTION	92	0	266	Incinerate	0	0	0	0	0	0	0	0	0	0	0	0	0	0	0	0	0
				89	0	267+268+269	Landfill + unaccounted	0	0	0	0	0	0	0	0	0	0	0	0	0	0	0	0	0
						270	TOTAL		-520.396	-83.991	-32.2423	-607.696	-67.6822	0	-9115.03	-51.6645	-454.407	-1.25115	-78.1365	-1193.52	-0.271112	-64.869	-695.147	-18731.5
			recyclability	credit	from input	4	Non-ferro	0.125
				0.75	1	263	Re-use	0.09375	-41.0882	0	0	0	0	-0.0852967	-4.29185	-2.18693	-102.977	-0.00339302	-1.31984	-19.4105	-1.89661	-1.00129	-33.1718	-54.4742
			0	0.4	0	264	Recycle	0	0	0	0	0	0	0	0	0	0	0	0	0	0	0	0	0
			Recycling credits at 94% already	0	0	265	Recover	0	0	0	0	0	0	0	0	0	0	0	0	0	0	0	0	0
			deducted from PRODUCTION	92	0	266	Incinerate	0	0	0	0	0	0	0	0	0	0	0	0	0	0	0	0	0
				89	0	267+268+269	Landfill + unaccounted	0	0	0	0	0	0	0	0	0	0	0	0	0	0	0	0	0
						270	TOTAL		-41.0882	0	0	0	0	-0.0852967	-4.29185	-2.18693	-102.977	-0.00339302	-1.31984	-19.4105	-1.89661	-1.00129	-33.1718	-54.4742
			recyclability	credit	from input	5	Coating	0
				0.75	0	263	Re-use	0	0	0	0	0	0	0	0	0	0	0	0	0	0	0	0	0
			0	0.4	0	264	Recycle	0	0	0	0	0	0	0	0	0	0	0	0	0	0	0	0	0
				0	0	265	Recover	0	0	0	0	0	0	0	0	0	0	0	0	0	0	0	0	0
				92	0	266	Incinerate	0	0	0	0	0	0	0	0	0	0	0	0	0	0	0	0	0
				89	0	267+268+269	Landfill + unaccounted	0	0	0	0	0	0	0	0	0	0	0	0	0	0	0	0	0
						270	TOTAL		0	0	0	0	0	0	0	0	0	0	0	0	0	0	0	0
			recyclability	credit	from input	6	Electronics	0
				0.75	0	263	Re-use	0	0	0	0	0	0	0	0	0	0	0	0	0	0	0	0	0
			0	0.4	0	264	Recycle	0	0	0	0	0	0	0	0	0	0	0	0	0	0	0	0	0
				0.3	0	265	Recover	0	0	0	0	0	0	0	0	0	0	0	0	0	0	0	0	0
				92	0	266	Incinerate	0	0	0	0	0	0	0	0	0	0	0	0	0	0	0	0	0
				89	0	267+268+269	Landfill + unaccounted	0	0	0	0	0	0	0	0	0	0	0	0	0	0	0	0	0
						270	TOTAL		0	0	0	0	0	0	0	0	0	0	0	0	0	0	0	0
			recyclability	credit	from input	7a	Misc. excl. refrigerant	0
				0.75	0	263	Re-use	0	0	0	0	0	0	0	0	0	0	0	0	0	0	0	0	0
			0	0.4	0	264	Recycle	0	0	0	0	0	0	0	0	0	0	0	0	0	0	0	0	0
				0.3	0	265	Recover	0	0	0	0	0	0	0	0	0	0	0	0	0	0	0	0	0
				92	0	266	Incinerate	0	0	0	0	0	0	0	0	0	0	0	0	0	0	0	0	0
				89	0	267+268+269	Landfill + unaccounted	0	0	0	0	0	0	0	0	0	0	0	0	0	0	0	0	0
						270	TOTAL		0	0	0	0	0	0	0	0	0	0	0	0	0	0	0	0
			recyclability	credit	from input	7b	Refrigerant	0
				0.75	0	263	Re-use	0	0	0	0	0	0	0	0	0	0	0	0	0	0	0	0	0
			0	0.4	0	264	Recycle	0	0	0	0	0	0	0	0	0	0	0	0	0	0	0	0	0
				0.3	0	265	Recover	0	0	0	0	0	0	0	0	0	0	0	0	0	0	0	0	0
				92	0	266	Incinerate	0	0	0	0	0	0	0	0	0	0	0	0	0	0	0	0	0
				89	0	267+268+269	Landfill + unaccounted	0	0	0	0	0	0	0	0	0	0	0	0	0	0	0	0	0
						270	TOTAL		0	0	0	0	0	0	0	0	0	0	0	0	0	0	0	0
			recyclability	credit	from input	7c	Hg(Mercury)	0	mg/product
				0.75	0	263	Re-use	0	0	0	0	0	0	0	0	0	0	0	0	0	0	0	0	0
			0	0.4	0	264	Recycle	0	0	0	0	0	0	0	0	0	0	0	0	0	0	0	0	0
			Mercury EoL impact only for HMa	0.3	0	265	Recover	0	0	0	0	0	0	0	0	0	0	0	0	0	0	0	0	0
				92	0	266	Incinerate	0	0	0	0	0	0	0	0	0	0	0	0	0	0	0	0	0
				89	0	267+268+269	Landfill + unaccounted	0	0	0	0	0	0	0	0	0	0	0	0	0	0	0	0	0
						270	TOTAL		0	0	0	0	0	0	0	0	0	0	0	0	0	0	0	0
			recyclability	credit	from input	9	Aux. (BoP)	0.125
				0.75	1	263	Re-use	0.09375	0	#DIV/0!	#DIV/0!	#DIV/0!	#DIV/0!	#DIV/0!	#DIV/0!	-86.0592	-283.875	0	0	0	0	0	0	0
			0	0.4	0	264	Recycle
				0.3	0	265	Recover
				92	0	266	Incinerate
				89	0	267+268+269	Landfill + unaccounted
						270	TOTAL		0	#DIV/0!	#DIV/0!	#DIV/0!	#DIV/0!	#DIV/0!	#DIV/0!	-86.0592	-283.875	0	0	0	0	0	0	0
			recyclability	credit	from input	9	Aux. (Hydrogen)	0.125
				0.75	0	263	Re-use
			0	0.4	0	264	Recycle
				0.3	0	265	Recover
				92	0	266	Incinerate
				89	1	267+268+269	Landfill + unaccounted
						270	TOTAL
			recyclability	credit	from input	8	Extra (Pt)	0.125
				0.75	0	263	Re-use	0	0	#DIV/0!	#DIV/0!	#DIV/0!	#DIV/0!	#DIV/0!	#DIV/0!	0	0	0	0	0	0	0	0	0
			0	0.4	0.75	264	Recycle	0.0375	-3230.62	#DIV/0!	#DIV/0!	#DIV/0!	#DIV/0!	#DIV/0!	#DIV/0!	-199.849	-11119.5	-233.631	-84.6563	-596.934	-1086.78	-170.723	-1510.41	-112635
				0.3	0	265	Recover	0	0	#DIV/0!	#DIV/0!	#DIV/0!	#DIV/0!	#DIV/0!	#DIV/0!	0	0	0	0	0	0	0	0	0
				92	0	266	Incinerate	0	0	0	0	0	0	0	0	0	0	0	0	0	0	0	0	0
				89	0.25	267+268+269	Landfill + unaccounted	0.03125	0.162268	0	0	0	0	0	0.536607	0.0121125	0.0229944	0.000673268	0.0200312	0.0475	0	0.211266	0.0134839	0.770878
						270	TOTAL		-3230.46	#DIV/0!	#DIV/0!	#DIV/0!	#DIV/0!	#DIV/0!	#DIV/0!	-199.837	-11119.4	-233.63	-84.6363	-596.886	-1086.78	-170.512	-1510.39	-112635
			recyclability	credit	from input	8	Extra (CB)	0.125
				0.75	0	263	Re-use	0	0	#DIV/0!	#DIV/0!	#DIV/0!	#DIV/0!	#DIV/0!	#DIV/0!	0	0	0	0	0	0	0	0	0
			0	0.4	0	264	Recycle	0	0	#DIV/0!	#DIV/0!	#DIV/0!	#DIV/0!	#DIV/0!	#DIV/0!	0	0	0	0	0	0	0	0	0
				0.3	0	265	Recover	0	0	#DIV/0!	#DIV/0!	#DIV/0!	#DIV/0!	#DIV/0!	#DIV/0!	0	0	0	0	0	0	0	0	0
				92	0	266	Incinerate	0	0	0	0	0	0	0	0	0	0	0	0	0	0	0	0	0
				89	1	267+268+269	Landfill + unaccounted	0.125	20.0055	0	0	0	0	0	66.1566	1.49331	2.83491	0.083005	2.46958	5.85612	0	26.0464	1.66239	95.0391
						270	TOTAL		20.0055	#DIV/0!	#DIV/0!	#DIV/0!	#DIV/0!	#DIV/0!	#DIV/0!	1.49331	2.83491	0.083005	2.46958	5.85612	0	26.0464	1.66239	95.0391
			recyclability	credit	from input	8	Extra (Nafion)	0.125
				0.75	0	263	Re-use	0	0	#DIV/0!	#DIV/0!	#DIV/0!	#DIV/0!	#DIV/0!	#DIV/0!	0	0	0	0	0	0	0	0	0
			0	0.4	0	264	Recycle	0	0	#DIV/0!	#DIV/0!	#DIV/0!	#DIV/0!	#DIV/0!	#DIV/0!	0	0	0	0	0	0	0	0	0
				0.3	0	265	Recover	0	0	#DIV/0!	#DIV/0!	#DIV/0!	#DIV/0!	#DIV/0!	#DIV/0!	0	0	0	0	0	0	0	0	0
				92	0.5	266	Incinerate	0.0625	2.85755	0	0	0	0	0	0	0.214103	0.4265	0.005971	0	0.7677	0	3.62525	0.243105	13.8612
				89	0.5	267+268+269	Landfill + unaccounted	0.0625	2.914	0	0	0	0	0	9.63634	0.217515	0.412931	0.0120905	0.359718	0.853	0	3.7939	0.242143	13.8433
						270	TOTAL		5.77155	#DIV/0!	#DIV/0!	#DIV/0!	#DIV/0!	#DIV/0!	#DIV/0!	0.431618	0.839431	0.0180615	0.359718	1.6207	0	7.41915	0.485248	27.7046
			recyclability	credit	from input	8	Extra (CFRP)	0.125
				0.75	0.980416	263	Re-use	0.091914	-19677.6	#DIV/0!	#DIV/0!	#DIV/0!	#DIV/0!	#DIV/0!	#DIV/0!	-1408.4	-7049.28	-407.602	-521.846	-2805.39	-9905.81	-2244.8	-11311.7	-618999
			0	0.4	0	264	Recycle	0	0	#DIV/0!	#DIV/0!	#DIV/0!	#DIV/0!	#DIV/0!	#DIV/0!	0	0	0	0	0	0	0	0	0
				0.3	0	265	Recover	0	0	#DIV/0!	#DIV/0!	#DIV/0!	#DIV/0!	#DIV/0!	#DIV/0!	0	0	0	0	0	0	0	0	0
				92	0	266	Incinerate	0	0	0	0	0	0	0	0	0	0	0	0	0	0	0	0	0
				89	0.0195845	267+268+269	Landfill + unaccounted	0.00244806	29.8552	0	0	0	0	0	98.7287	2.22854	4.23067	0.123872	3.68548	8.73937	0	38.8702	2.48087	141.831
						270	TOTAL		-19647.7	#DIV/0!	#DIV/0!	#DIV/0!	#DIV/0!	#DIV/0!	#DIV/0!	-1406.17	-7045.05	-407.478	-518.161	-2796.65	-9905.81	-2205.92	-11309.2	-618857
			recyclability	credit	from input	8	Extra (Glue)	0.125
				0.75	0	263	Re-use	0	0	#DIV/0!	#DIV/0!	#DIV/0!	#DIV/0!	#DIV/0!	#DIV/0!	0	0	0	0	0	0	0	0	0
			0	0.4	0	264	Recycle	0	0	#DIV/0!	#DIV/0!	#DIV/0!	#DIV/0!	#DIV/0!	#DIV/0!	0	0	0	0	0	0	0	0	0
				0.3	0	265	Recover	0	0	#DIV/0!	#DIV/0!	#DIV/0!	#DIV/0!	#DIV/0!	#DIV/0!	0	0	0	0	0	0	0	0	0
				92	1	266	Incinerate	0.125	47.0746	0	0	0	0	0	0	3.52708	7.02606	0.0983649	0	12.6469	0	59.7215	4.00486	228.347
				89	0	267+268+269	Landfill + unaccounted	0	0	0	0	0	0	0	0	0	0	0	0	0	0	0	0	0
						270	TOTAL		47.0746	#DIV/0!	#DIV/0!	#DIV/0!	#DIV/0!	#DIV/0!	#DIV/0!	3.52708	7.02606	0.0983649	0	12.6469	0	59.7215	4.00486	228.347
			recyclability	credit	from input	8	Extra (Silicone)	0.125
				0.75	1	263	Re-use	0.09375	-113.009	#DIV/0!	#DIV/0!	#DIV/0!	#DIV/0!	#DIV/0!	#DIV/0!	-5.43239	-24.6609	-5.22888	-1.28376	-17.5685	-29.4175	-5.22446	-39.9501	-2972.72
			0	0.4	0	264	Recycle	0	0	#DIV/0!	#DIV/0!	#DIV/0!	#DIV/0!	#DIV/0!	#DIV/0!	0	0	0	0	0	0	0	0	0
				0.3	0	265	Recover	0	0	#DIV/0!	#DIV/0!	#DIV/0!	#DIV/0!	#DIV/0!	#DIV/0!	0	0	0	0	0	0	0	0	0
				92	0	266	Incinerate	0	0	0	0	0	0	0	0	0	0	0	0	0	0	0	0	0
				89	0	267+268+269	Landfill + unaccounted	0	0	0	0	0	0	0	0	0	0	0	0	0	0	0	0	0
						270	TOTAL		-113.009	#DIV/0!	#DIV/0!	#DIV/0!	#DIV/0!	#DIV/0!	#DIV/0!	-5.43239	-24.6609	-5.22888	-1.28376	-17.5685	-29.4175	-5.22446	-39.9501	-2972.72
			recyclability	credit	from input	8	Extra (Aux. Battery)	0.125
				0.75	1	263	Re-use	0.09375	-7416.1	#DIV/0!	#DIV/0!	#DIV/0!	#DIV/0!	#DIV/0!	#DIV/0!	-346.356	-4298.89	-6152.92	-224.113	-1202.06	-794.582	-407.478	-896.452	-142.617
			0	0.4	0	264	Recycle	0	0	#DIV/0!	#DIV/0!	#DIV/0!	#DIV/0!	#DIV/0!	#DIV/0!	0	0	0	0	0	0	0	0	0
				0.3	0	265	Recover	0	0	#DIV/0!	#DIV/0!	#DIV/0!	#DIV/0!	#DIV/0!	#DIV/0!	0	0	0	0	0	0	0	0	0
				92	0	266	Incinerate	0	0	0	0	0	0	0	0	0	0	0	0	0	0	0	0	0
				89	0	267+268+269	Landfill + unaccounted	0	0	0	0	0	0	0	0	0	0	0	0	0	0	0	0	0
						270	TOTAL		-7416.1	#DIV/0!	#DIV/0!	#DIV/0!	#DIV/0!	#DIV/0!	#DIV/0!	-346.356	-4298.89	-6152.92	-224.113	-1202.06	-794.582	-407.478	-896.452	-142.617
					weight g		TOTALS EoL	weight share	GER	electr	feedst	water (proces)	water (cool)	haz. Waste	non-haz. Waste	GWP	AD	VOC	POP	HM	PAH	PM	Metal	EUP
			percentages of EoL available mass (excl. stock effect)		459108	263	Re-use	0.00971578	-27934.2	#DIV/0!	#DIV/0!	#DIV/0!	#DIV/0!	#DIV/0!	#DIV/0!	-1906.65	-12286.5	-6569.74	-826.699	-5242.73	-10735	-2733.9	-12976.4	-641701
					3895.57	264	Recycle	8.24392e-05	-3243.13	#DIV/0!	#DIV/0!	#DIV/0!	#DIV/0!	#DIV/0!	#DIV/0!	-200.486	-11125	-233.632	-84.6563	-596.934	-1086.8	-172.271	-1519.4	-113234
					25326.3	265	Recover	0.000535963	0	#DIV/0!	#DIV/0!	#DIV/0!	#DIV/0!	#DIV/0!	#DIV/0!	0	0	0	0	0	0	0	0	0
					70744.5	266	Incinerate	0.00149712	49.9322	0	0	0	0	0	0	3.74119	7.45256	0.104336	0	13.4146	0	63.3468	4.24796	242.208
					4.66948e+07	267+268+269	Landfill + unaccounted	0.988169	52.937	0	0	0	0	0	175.058	3.95148	7.5015	0.219641	6.53481	15.496	0	68.9218	4.39889	251.485
						270	TOTAL		-31074.5	#DIV/0!	#DIV/0!	#DIV/0!	#DIV/0!	#DIV/0!	#DIV/0!	-2099.45	-23396.6	-6803.05	-904.821	-5810.75	-11821.8	-2773.91	-14487.1	-754442
							of which
					488330	263-265	reuse/recycle/recover	0.0103342	-31177.3	#DIV/0!	#DIV/0!	#DIV/0!	#DIV/0!	#DIV/0!	#DIV/0!	-2107.14	-23411.5	-6803.37	-911.355	-5839.66	-11821.8	-2906.17	-14495.8	-754935
					4.67655e+07	266-269	incinerate/landfill	0.989666	102.869	0	0	0	0	0	175.058	7.69267	14.9541	0.323977	6.53481	28.9106	0	132.269	8.64685	493.693

## Sheet: Uitrekensheet
						nr			MJ	MJ	MJ	water proces	Water cool	waste haz	waste non	GWP	AD	VOC	POP	Hma	PAH	PM	HMw	EP
						1	#N/A	102	86149.9	0	0	0	0	0	0	5329.3	296519	6230.15	2257.5	15918.2	28980.9	4552.62	40277.5	3.00361e+06
						2	#N/A	103	180.511	0	0	0	0	0	0	4.10292	22.2473	1.06979	0.785865	11.2569	52.5903	5.80505	57.5035	7806.09
						3	#N/A	104	0	0	0	0	0	0	0	536.739	0	0	0	0	0	0	0	0
						4	#N/A	10	454.101	77.0473	223.766	42.0677	207.457	9.22031	531.021	17.9186	198.062	7.49151	0	13.0594	8.36744	28.8135	0.0115254	2191.33
						5	#N/A	105	102.611	0	0	0	0	0	0	4.89117	19.2311	38.0719	1.60284	28.712	40.6452	5.88362	49.0217	8506.48
						6	#N/A	106	3647.74	0	0	0	0	0	0	261.083	1306.76	75.5593	96.7374	520.05	1836.29	416.13	2096.9	114747
						7	#N/A	26	5273.68	823.752	343.832	6437.61	716.99	0	85001.8	527.452	4761.88	11.5602	654.514	12606.2	2.40198	672.704	7341.39	197878
						8	#N/A	107	303.768	0	0	0	0	0	0	14.6023	66.2887	14.0552	3.45075	47.224	79.0744	14.0433	107.386	7990.68
						9	#N/A	19	416.911	133.557	68.3633	343.897	1718.26	44.6699	1971.05	21.2565	184.805	0.029372	0	0	0.410718	51.5845	299.833	19958.7
						10	#N/A	30	438.277	0	0	0	0	0.909836	45.7799	23.3273	1098.43	0.0361924	14.0783	207.046	20.2306	10.6805	353.834	581.06
						11	#N/A	23	241.072	66.5421	-2.29222	0	0	0	11652.2	20.017	52.2918	1.70758	174.634	37.6385	0.473866	14.6017	22.8198	557.82
						12	ERR	#VALUE!	#VALUE!	#VALUE!	#VALUE!	#VALUE!	#VALUE!	#VALUE!	#VALUE!	#VALUE!	#VALUE!	#VALUE!	#VALUE!	#VALUE!	#VALUE!	#VALUE!	#VALUE!	#VALUE!
						13	#N/A	108	0	0	0	0	0	0	0	917.965	3028	0	0	0	0	0	0	0
						14	ERR	#VALUE!	#VALUE!	#VALUE!	#VALUE!	#VALUE!	#VALUE!	#VALUE!	#VALUE!	#VALUE!	#VALUE!	#VALUE!	#VALUE!	#VALUE!	#VALUE!	#VALUE!	#VALUE!	#VALUE!
						15	#N/A	106	209894	0	0	0	0	0	0	15022.9	75192.3	4347.75	5566.36	29924.2	105662	23944.5	120658	6.60265e+06
						16	ERR	#VALUE!	#VALUE!	#VALUE!	#VALUE!	#VALUE!	#VALUE!	#VALUE!	#VALUE!	#VALUE!	#VALUE!	#VALUE!	#VALUE!	#VALUE!	#VALUE!	#VALUE!	#VALUE!	#VALUE!
						17	#N/A	109	79105.1	0	0	0	0	0	0	3694.47	45854.9	65631.1	2390.54	12822	8475.54	4346.43	9562.15	1521.25
						18	ERR	#VALUE!	#VALUE!	#VALUE!	#VALUE!	#VALUE!	#VALUE!	#VALUE!	#VALUE!	#VALUE!	#VALUE!	#VALUE!	#VALUE!	#VALUE!	#VALUE!	#VALUE!	#VALUE!	#VALUE!
						19	ERR	#VALUE!	#VALUE!	#VALUE!	#VALUE!	#VALUE!	#VALUE!	#VALUE!	#VALUE!	#VALUE!	#VALUE!	#VALUE!	#VALUE!	#VALUE!	#VALUE!	#VALUE!	#VALUE!	#VALUE!
						20	ERR	#VALUE!	#VALUE!	#VALUE!	#VALUE!	#VALUE!	#VALUE!	#VALUE!	#VALUE!	#VALUE!	#VALUE!	#VALUE!	#VALUE!	#VALUE!	#VALUE!	#VALUE!	#VALUE!	#VALUE!
						21	ERR	#VALUE!	#VALUE!	#VALUE!	#VALUE!	#VALUE!	#VALUE!	#VALUE!	#VALUE!	#VALUE!	#VALUE!	#VALUE!	#VALUE!	#VALUE!	#VALUE!	#VALUE!	#VALUE!	#VALUE!
						22	ERR	#VALUE!	#VALUE!	#VALUE!	#VALUE!	#VALUE!	#VALUE!	#VALUE!	#VALUE!	#VALUE!	#VALUE!	#VALUE!	#VALUE!	#VALUE!	#VALUE!	#VALUE!	#VALUE!	#VALUE!
						23	ERR	#VALUE!	#VALUE!	#VALUE!	#VALUE!	#VALUE!	#VALUE!	#VALUE!	#VALUE!	#VALUE!	#VALUE!	#VALUE!	#VALUE!	#VALUE!	#VALUE!	#VALUE!	#VALUE!	#VALUE!
						24	ERR	#VALUE!	#VALUE!	#VALUE!	#VALUE!	#VALUE!	#VALUE!	#VALUE!	#VALUE!	#VALUE!	#VALUE!	#VALUE!	#VALUE!	#VALUE!	#VALUE!	#VALUE!	#VALUE!	#VALUE!
						25	ERR	#VALUE!	#VALUE!	#VALUE!	#VALUE!	#VALUE!	#VALUE!	#VALUE!	#VALUE!	#VALUE!	#VALUE!	#VALUE!	#VALUE!	#VALUE!	#VALUE!	#VALUE!	#VALUE!	#VALUE!
						26	ERR	#VALUE!	#VALUE!	#VALUE!	#VALUE!	#VALUE!	#VALUE!	#VALUE!	#VALUE!	#VALUE!	#VALUE!	#VALUE!	#VALUE!	#VALUE!	#VALUE!	#VALUE!	#VALUE!	#VALUE!
						27	ERR	#VALUE!	#VALUE!	#VALUE!	#VALUE!	#VALUE!	#VALUE!	#VALUE!	#VALUE!	#VALUE!	#VALUE!	#VALUE!	#VALUE!	#VALUE!	#VALUE!	#VALUE!	#VALUE!	#VALUE!
						28	ERR	#VALUE!	#VALUE!	#VALUE!	#VALUE!	#VALUE!	#VALUE!	#VALUE!	#VALUE!	#VALUE!	#VALUE!	#VALUE!	#VALUE!	#VALUE!	#VALUE!	#VALUE!	#VALUE!	#VALUE!
						29	ERR	#VALUE!	#VALUE!	#VALUE!	#VALUE!	#VALUE!	#VALUE!	#VALUE!	#VALUE!	#VALUE!	#VALUE!	#VALUE!	#VALUE!	#VALUE!	#VALUE!	#VALUE!	#VALUE!	#VALUE!
						30	ERR	#VALUE!	#VALUE!	#VALUE!	#VALUE!	#VALUE!	#VALUE!	#VALUE!	#VALUE!	#VALUE!	#VALUE!	#VALUE!	#VALUE!	#VALUE!	#VALUE!	#VALUE!	#VALUE!	#VALUE!
						31	ERR	#VALUE!	#VALUE!	#VALUE!	#VALUE!	#VALUE!	#VALUE!	#VALUE!	#VALUE!	#VALUE!	#VALUE!	#VALUE!	#VALUE!	#VALUE!	#VALUE!	#VALUE!	#VALUE!	#VALUE!
						32	ERR	#VALUE!	#VALUE!	#VALUE!	#VALUE!	#VALUE!	#VALUE!	#VALUE!	#VALUE!	#VALUE!	#VALUE!	#VALUE!	#VALUE!	#VALUE!	#VALUE!	#VALUE!	#VALUE!	#VALUE!
						33	ERR	#VALUE!	#VALUE!	#VALUE!	#VALUE!	#VALUE!	#VALUE!	#VALUE!	#VALUE!	#VALUE!	#VALUE!	#VALUE!	#VALUE!	#VALUE!	#VALUE!	#VALUE!	#VALUE!	#VALUE!
						34	ERR	#VALUE!	#VALUE!	#VALUE!	#VALUE!	#VALUE!	#VALUE!	#VALUE!	#VALUE!	#VALUE!	#VALUE!	#VALUE!	#VALUE!	#VALUE!	#VALUE!	#VALUE!	#VALUE!	#VALUE!
						35	ERR	#VALUE!	#VALUE!	#VALUE!	#VALUE!	#VALUE!	#VALUE!	#VALUE!	#VALUE!	#VALUE!	#VALUE!	#VALUE!	#VALUE!	#VALUE!	#VALUE!	#VALUE!	#VALUE!	#VALUE!
						36	ERR	#VALUE!	#VALUE!	#VALUE!	#VALUE!	#VALUE!	#VALUE!	#VALUE!	#VALUE!	#VALUE!	#VALUE!	#VALUE!	#VALUE!	#VALUE!	#VALUE!	#VALUE!	#VALUE!	#VALUE!
						37	ERR	#VALUE!	#VALUE!	#VALUE!	#VALUE!	#VALUE!	#VALUE!	#VALUE!	#VALUE!	#VALUE!	#VALUE!	#VALUE!	#VALUE!	#VALUE!	#VALUE!	#VALUE!	#VALUE!	#VALUE!
						38	ERR	#VALUE!	#VALUE!	#VALUE!	#VALUE!	#VALUE!	#VALUE!	#VALUE!	#VALUE!	#VALUE!	#VALUE!	#VALUE!	#VALUE!	#VALUE!	#VALUE!	#VALUE!	#VALUE!	#VALUE!
						39	ERR	#VALUE!	#VALUE!	#VALUE!	#VALUE!	#VALUE!	#VALUE!	#VALUE!	#VALUE!	#VALUE!	#VALUE!	#VALUE!	#VALUE!	#VALUE!	#VALUE!	#VALUE!	#VALUE!	#VALUE!
						40	ERR	#VALUE!	#VALUE!	#VALUE!	#VALUE!	#VALUE!	#VALUE!	#VALUE!	#VALUE!	#VALUE!	#VALUE!	#VALUE!	#VALUE!	#VALUE!	#VALUE!	#VALUE!	#VALUE!	#VALUE!
						41	ERR	#VALUE!	#VALUE!	#VALUE!	#VALUE!	#VALUE!	#VALUE!	#VALUE!	#VALUE!	#VALUE!	#VALUE!	#VALUE!	#VALUE!	#VALUE!	#VALUE!	#VALUE!	#VALUE!	#VALUE!
						42	ERR	#VALUE!	#VALUE!	#VALUE!	#VALUE!	#VALUE!	#VALUE!	#VALUE!	#VALUE!	#VALUE!	#VALUE!	#VALUE!	#VALUE!	#VALUE!	#VALUE!	#VALUE!	#VALUE!	#VALUE!
						43	ERR	#VALUE!	#VALUE!	#VALUE!	#VALUE!	#VALUE!	#VALUE!	#VALUE!	#VALUE!	#VALUE!	#VALUE!	#VALUE!	#VALUE!	#VALUE!	#VALUE!	#VALUE!	#VALUE!	#VALUE!
						44	ERR	#VALUE!	#VALUE!	#VALUE!	#VALUE!	#VALUE!	#VALUE!	#VALUE!	#VALUE!	#VALUE!	#VALUE!	#VALUE!	#VALUE!	#VALUE!	#VALUE!	#VALUE!	#VALUE!	#VALUE!
						45	ERR	#VALUE!	#VALUE!	#VALUE!	#VALUE!	#VALUE!	#VALUE!	#VALUE!	#VALUE!	#VALUE!	#VALUE!	#VALUE!	#VALUE!	#VALUE!	#VALUE!	#VALUE!	#VALUE!	#VALUE!
						46	ERR	#VALUE!	#VALUE!	#VALUE!	#VALUE!	#VALUE!	#VALUE!	#VALUE!	#VALUE!	#VALUE!	#VALUE!	#VALUE!	#VALUE!	#VALUE!	#VALUE!	#VALUE!	#VALUE!	#VALUE!
						47	ERR	#VALUE!	#VALUE!	#VALUE!	#VALUE!	#VALUE!	#VALUE!	#VALUE!	#VALUE!	#VALUE!	#VALUE!	#VALUE!	#VALUE!	#VALUE!	#VALUE!	#VALUE!	#VALUE!	#VALUE!
						48	ERR	#VALUE!	#VALUE!	#VALUE!	#VALUE!	#VALUE!	#VALUE!	#VALUE!	#VALUE!	#VALUE!	#VALUE!	#VALUE!	#VALUE!	#VALUE!	#VALUE!	#VALUE!	#VALUE!	#VALUE!
						49	ERR	#VALUE!	#VALUE!	#VALUE!	#VALUE!	#VALUE!	#VALUE!	#VALUE!	#VALUE!	#VALUE!	#VALUE!	#VALUE!	#VALUE!	#VALUE!	#VALUE!	#VALUE!	#VALUE!	#VALUE!
						50	ERR	#VALUE!	#VALUE!	#VALUE!	#VALUE!	#VALUE!	#VALUE!	#VALUE!	#VALUE!	#VALUE!	#VALUE!	#VALUE!	#VALUE!	#VALUE!	#VALUE!	#VALUE!	#VALUE!	#VALUE!
						51	ERR	#VALUE!	#VALUE!	#VALUE!	#VALUE!	#VALUE!	#VALUE!	#VALUE!	#VALUE!	#VALUE!	#VALUE!	#VALUE!	#VALUE!	#VALUE!	#VALUE!	#VALUE!	#VALUE!	#VALUE!
						52	ERR	#VALUE!	#VALUE!	#VALUE!	#VALUE!	#VALUE!	#VALUE!	#VALUE!	#VALUE!	#VALUE!	#VALUE!	#VALUE!	#VALUE!	#VALUE!	#VALUE!	#VALUE!	#VALUE!	#VALUE!
						53	ERR	#VALUE!	#VALUE!	#VALUE!	#VALUE!	#VALUE!	#VALUE!	#VALUE!	#VALUE!	#VALUE!	#VALUE!	#VALUE!	#VALUE!	#VALUE!	#VALUE!	#VALUE!	#VALUE!	#VALUE!
						54	ERR	#VALUE!	#VALUE!	#VALUE!	#VALUE!	#VALUE!	#VALUE!	#VALUE!	#VALUE!	#VALUE!	#VALUE!	#VALUE!	#VALUE!	#VALUE!	#VALUE!	#VALUE!	#VALUE!	#VALUE!
						55	ERR	#VALUE!	#VALUE!	#VALUE!	#VALUE!	#VALUE!	#VALUE!	#VALUE!	#VALUE!	#VALUE!	#VALUE!	#VALUE!	#VALUE!	#VALUE!	#VALUE!	#VALUE!	#VALUE!	#VALUE!
						56	ERR	#VALUE!	#VALUE!	#VALUE!	#VALUE!	#VALUE!	#VALUE!	#VALUE!	#VALUE!	#VALUE!	#VALUE!	#VALUE!	#VALUE!	#VALUE!	#VALUE!	#VALUE!	#VALUE!	#VALUE!
						57	ERR	#VALUE!	#VALUE!	#VALUE!	#VALUE!	#VALUE!	#VALUE!	#VALUE!	#VALUE!	#VALUE!	#VALUE!	#VALUE!	#VALUE!	#VALUE!	#VALUE!	#VALUE!	#VALUE!	#VALUE!
						58	ERR	#VALUE!	#VALUE!	#VALUE!	#VALUE!	#VALUE!	#VALUE!	#VALUE!	#VALUE!	#VALUE!	#VALUE!	#VALUE!	#VALUE!	#VALUE!	#VALUE!	#VALUE!	#VALUE!	#VALUE!
						59	ERR	#VALUE!	#VALUE!	#VALUE!	#VALUE!	#VALUE!	#VALUE!	#VALUE!	#VALUE!	#VALUE!	#VALUE!	#VALUE!	#VALUE!	#VALUE!	#VALUE!	#VALUE!	#VALUE!	#VALUE!
						60	ERR	#VALUE!	#VALUE!	#VALUE!	#VALUE!	#VALUE!	#VALUE!	#VALUE!	#VALUE!	#VALUE!	#VALUE!	#VALUE!	#VALUE!	#VALUE!	#VALUE!	#VALUE!	#VALUE!	#VALUE!
						61	ERR	#VALUE!	#VALUE!	#VALUE!	#VALUE!	#VALUE!	#VALUE!	#VALUE!	#VALUE!	#VALUE!	#VALUE!	#VALUE!	#VALUE!	#VALUE!	#VALUE!	#VALUE!	#VALUE!	#VALUE!
						62	ERR	#VALUE!	#VALUE!	#VALUE!	#VALUE!	#VALUE!	#VALUE!	#VALUE!	#VALUE!	#VALUE!	#VALUE!	#VALUE!	#VALUE!	#VALUE!	#VALUE!	#VALUE!	#VALUE!	#VALUE!
						63	ERR	#VALUE!	#VALUE!	#VALUE!	#VALUE!	#VALUE!	#VALUE!	#VALUE!	#VALUE!	#VALUE!	#VALUE!	#VALUE!	#VALUE!	#VALUE!	#VALUE!	#VALUE!	#VALUE!	#VALUE!
						64	ERR	#VALUE!	#VALUE!	#VALUE!	#VALUE!	#VALUE!	#VALUE!	#VALUE!	#VALUE!	#VALUE!	#VALUE!	#VALUE!	#VALUE!	#VALUE!	#VALUE!	#VALUE!	#VALUE!	#VALUE!
						65	ERR	#VALUE!	#VALUE!	#VALUE!	#VALUE!	#VALUE!	#VALUE!	#VALUE!	#VALUE!	#VALUE!	#VALUE!	#VALUE!	#VALUE!	#VALUE!	#VALUE!	#VALUE!	#VALUE!	#VALUE!
						66	ERR	#VALUE!	#VALUE!	#VALUE!	#VALUE!	#VALUE!	#VALUE!	#VALUE!	#VALUE!	#VALUE!	#VALUE!	#VALUE!	#VALUE!	#VALUE!	#VALUE!	#VALUE!	#VALUE!	#VALUE!
						67	ERR	#VALUE!	#VALUE!	#VALUE!	#VALUE!	#VALUE!	#VALUE!	#VALUE!	#VALUE!	#VALUE!	#VALUE!	#VALUE!	#VALUE!	#VALUE!	#VALUE!	#VALUE!	#VALUE!	#VALUE!
						68	ERR	#VALUE!	#VALUE!	#VALUE!	#VALUE!	#VALUE!	#VALUE!	#VALUE!	#VALUE!	#VALUE!	#VALUE!	#VALUE!	#VALUE!	#VALUE!	#VALUE!	#VALUE!	#VALUE!	#VALUE!
						69	ERR	#VALUE!	#VALUE!	#VALUE!	#VALUE!	#VALUE!	#VALUE!	#VALUE!	#VALUE!	#VALUE!	#VALUE!	#VALUE!	#VALUE!	#VALUE!	#VALUE!	#VALUE!	#VALUE!	#VALUE!
						70	ERR	#VALUE!	#VALUE!	#VALUE!	#VALUE!	#VALUE!	#VALUE!	#VALUE!	#VALUE!	#VALUE!	#VALUE!	#VALUE!	#VALUE!	#VALUE!	#VALUE!	#VALUE!	#VALUE!	#VALUE!
						71	ERR	#VALUE!	#VALUE!	#VALUE!	#VALUE!	#VALUE!	#VALUE!	#VALUE!	#VALUE!	#VALUE!	#VALUE!	#VALUE!	#VALUE!	#VALUE!	#VALUE!	#VALUE!	#VALUE!	#VALUE!
						72	ERR	#VALUE!	#VALUE!	#VALUE!	#VALUE!	#VALUE!	#VALUE!	#VALUE!	#VALUE!	#VALUE!	#VALUE!	#VALUE!	#VALUE!	#VALUE!	#VALUE!	#VALUE!	#VALUE!	#VALUE!
						73	ERR	#VALUE!	#VALUE!	#VALUE!	#VALUE!	#VALUE!	#VALUE!	#VALUE!	#VALUE!	#VALUE!	#VALUE!	#VALUE!	#VALUE!	#VALUE!	#VALUE!	#VALUE!	#VALUE!	#VALUE!
						74	ERR	#VALUE!	#VALUE!	#VALUE!	#VALUE!	#VALUE!	#VALUE!	#VALUE!	#VALUE!	#VALUE!	#VALUE!	#VALUE!	#VALUE!	#VALUE!	#VALUE!	#VALUE!	#VALUE!	#VALUE!
						75	ERR	#VALUE!	#VALUE!	#VALUE!	#VALUE!	#VALUE!	#VALUE!	#VALUE!	#VALUE!	#VALUE!	#VALUE!	#VALUE!	#VALUE!	#VALUE!	#VALUE!	#VALUE!	#VALUE!	#VALUE!
						76	ERR	#VALUE!	#VALUE!	#VALUE!	#VALUE!	#VALUE!	#VALUE!	#VALUE!	#VALUE!	#VALUE!	#VALUE!	#VALUE!	#VALUE!	#VALUE!	#VALUE!	#VALUE!	#VALUE!	#VALUE!
						77	ERR	#VALUE!	#VALUE!	#VALUE!	#VALUE!	#VALUE!	#VALUE!	#VALUE!	#VALUE!	#VALUE!	#VALUE!	#VALUE!	#VALUE!	#VALUE!	#VALUE!	#VALUE!	#VALUE!	#VALUE!
						78	ERR	#VALUE!	#VALUE!	#VALUE!	#VALUE!	#VALUE!	#VALUE!	#VALUE!	#VALUE!	#VALUE!	#VALUE!	#VALUE!	#VALUE!	#VALUE!	#VALUE!	#VALUE!	#VALUE!	#VALUE!
						79	ERR	#VALUE!	#VALUE!	#VALUE!	#VALUE!	#VALUE!	#VALUE!	#VALUE!	#VALUE!	#VALUE!	#VALUE!	#VALUE!	#VALUE!	#VALUE!	#VALUE!	#VALUE!	#VALUE!	#VALUE!
						80	ERR	#VALUE!	#VALUE!	#VALUE!	#VALUE!	#VALUE!	#VALUE!	#VALUE!	#VALUE!	#VALUE!	#VALUE!	#VALUE!	#VALUE!	#VALUE!	#VALUE!	#VALUE!	#VALUE!	#VALUE!
						81	ERR	#VALUE!	#VALUE!	#VALUE!	#VALUE!	#VALUE!	#VALUE!	#VALUE!	#VALUE!	#VALUE!	#VALUE!	#VALUE!	#VALUE!	#VALUE!	#VALUE!	#VALUE!	#VALUE!	#VALUE!
						82	ERR	#VALUE!	#VALUE!	#VALUE!	#VALUE!	#VALUE!	#VALUE!	#VALUE!	#VALUE!	#VALUE!	#VALUE!	#VALUE!	#VALUE!	#VALUE!	#VALUE!	#VALUE!	#VALUE!	#VALUE!
						83	ERR	#VALUE!	#VALUE!	#VALUE!	#VALUE!	#VALUE!	#VALUE!	#VALUE!	#VALUE!	#VALUE!	#VALUE!	#VALUE!	#VALUE!	#VALUE!	#VALUE!	#VALUE!	#VALUE!	#VALUE!
						84	ERR	#VALUE!	#VALUE!	#VALUE!	#VALUE!	#VALUE!	#VALUE!	#VALUE!	#VALUE!	#VALUE!	#VALUE!	#VALUE!	#VALUE!	#VALUE!	#VALUE!	#VALUE!	#VALUE!	#VALUE!
						85	ERR	#VALUE!	#VALUE!	#VALUE!	#VALUE!	#VALUE!	#VALUE!	#VALUE!	#VALUE!	#VALUE!	#VALUE!	#VALUE!	#VALUE!	#VALUE!	#VALUE!	#VALUE!	#VALUE!	#VALUE!
						86	ERR	#VALUE!	#VALUE!	#VALUE!	#VALUE!	#VALUE!	#VALUE!	#VALUE!	#VALUE!	#VALUE!	#VALUE!	#VALUE!	#VALUE!	#VALUE!	#VALUE!	#VALUE!	#VALUE!	#VALUE!
						87	ERR	#VALUE!	#VALUE!	#VALUE!	#VALUE!	#VALUE!	#VALUE!	#VALUE!	#VALUE!	#VALUE!	#VALUE!	#VALUE!	#VALUE!	#VALUE!	#VALUE!	#VALUE!	#VALUE!	#VALUE!
						88	ERR	#VALUE!	#VALUE!	#VALUE!	#VALUE!	#VALUE!	#VALUE!	#VALUE!	#VALUE!	#VALUE!	#VALUE!	#VALUE!	#VALUE!	#VALUE!	#VALUE!	#VALUE!	#VALUE!	#VALUE!
						89	ERR	#VALUE!	#VALUE!	#VALUE!	#VALUE!	#VALUE!	#VALUE!	#VALUE!	#VALUE!	#VALUE!	#VALUE!	#VALUE!	#VALUE!	#VALUE!	#VALUE!	#VALUE!	#VALUE!	#VALUE!
						90	ERR	#VALUE!	#VALUE!	#VALUE!	#VALUE!	#VALUE!	#VALUE!	#VALUE!	#VALUE!	#VALUE!	#VALUE!	#VALUE!	#VALUE!	#VALUE!	#VALUE!	#VALUE!	#VALUE!	#VALUE!
						91	ERR	#VALUE!	#VALUE!	#VALUE!	#VALUE!	#VALUE!	#VALUE!	#VALUE!	#VALUE!	#VALUE!	#VALUE!	#VALUE!	#VALUE!	#VALUE!	#VALUE!	#VALUE!	#VALUE!	#VALUE!
						92	ERR	#VALUE!	#VALUE!	#VALUE!	#VALUE!	#VALUE!	#VALUE!	#VALUE!	#VALUE!	#VALUE!	#VALUE!	#VALUE!	#VALUE!	#VALUE!	#VALUE!	#VALUE!	#VALUE!	#VALUE!
						93	ERR	#VALUE!	#VALUE!	#VALUE!	#VALUE!	#VALUE!	#VALUE!	#VALUE!	#VALUE!	#VALUE!	#VALUE!	#VALUE!	#VALUE!	#VALUE!	#VALUE!	#VALUE!	#VALUE!	#VALUE!
						94	ERR	#VALUE!	#VALUE!	#VALUE!	#VALUE!	#VALUE!	#VALUE!	#VALUE!	#VALUE!	#VALUE!	#VALUE!	#VALUE!	#VALUE!	#VALUE!	#VALUE!	#VALUE!	#VALUE!	#VALUE!
						95	ERR	#VALUE!	#VALUE!	#VALUE!	#VALUE!	#VALUE!	#VALUE!	#VALUE!	#VALUE!	#VALUE!	#VALUE!	#VALUE!	#VALUE!	#VALUE!	#VALUE!	#VALUE!	#VALUE!	#VALUE!
						96	ERR	#VALUE!	#VALUE!	#VALUE!	#VALUE!	#VALUE!	#VALUE!	#VALUE!	#VALUE!	#VALUE!	#VALUE!	#VALUE!	#VALUE!	#VALUE!	#VALUE!	#VALUE!	#VALUE!	#VALUE!
						97	ERR	#VALUE!	#VALUE!	#VALUE!	#VALUE!	#VALUE!	#VALUE!	#VALUE!	#VALUE!	#VALUE!	#VALUE!	#VALUE!	#VALUE!	#VALUE!	#VALUE!	#VALUE!	#VALUE!	#VALUE!
						98	ERR	#VALUE!	#VALUE!	#VALUE!	#VALUE!	#VALUE!	#VALUE!	#VALUE!	#VALUE!	#VALUE!	#VALUE!	#VALUE!	#VALUE!	#VALUE!	#VALUE!	#VALUE!	#VALUE!	#VALUE!
						99	ERR	#VALUE!	#VALUE!	#VALUE!	#VALUE!	#VALUE!	#VALUE!	#VALUE!	#VALUE!	#VALUE!	#VALUE!	#VALUE!	#VALUE!	#VALUE!	#VALUE!	#VALUE!	#VALUE!	#VALUE!
						100	ERR	#VALUE!	#VALUE!	#VALUE!	#VALUE!	#VALUE!	#VALUE!	#VALUE!	#VALUE!	#VALUE!	#VALUE!	#VALUE!	#VALUE!	#VALUE!	#VALUE!	#VALUE!	#VALUE!	#VALUE!
						101	ERR	#VALUE!	#VALUE!	#VALUE!	#VALUE!	#VALUE!	#VALUE!	#VALUE!	#VALUE!	#VALUE!	#VALUE!	#VALUE!	#VALUE!	#VALUE!	#VALUE!	#VALUE!	#VALUE!	#VALUE!
						102	ERR	#VALUE!	#VALUE!	#VALUE!	#VALUE!	#VALUE!	#VALUE!	#VALUE!	#VALUE!	#VALUE!	#VALUE!	#VALUE!	#VALUE!	#VALUE!	#VALUE!	#VALUE!	#VALUE!	#VALUE!
						103	ERR	#VALUE!	#VALUE!	#VALUE!	#VALUE!	#VALUE!	#VALUE!	#VALUE!	#VALUE!	#VALUE!	#VALUE!	#VALUE!	#VALUE!	#VALUE!	#VALUE!	#VALUE!	#VALUE!	#VALUE!
						104	ERR	#VALUE!	#VALUE!	#VALUE!	#VALUE!	#VALUE!	#VALUE!	#VALUE!	#VALUE!	#VALUE!	#VALUE!	#VALUE!	#VALUE!	#VALUE!	#VALUE!	#VALUE!	#VALUE!	#VALUE!
						105	ERR	#VALUE!	#VALUE!	#VALUE!	#VALUE!	#VALUE!	#VALUE!	#VALUE!	#VALUE!	#VALUE!	#VALUE!	#VALUE!	#VALUE!	#VALUE!	#VALUE!	#VALUE!	#VALUE!	#VALUE!
						106	ERR	#VALUE!	#VALUE!	#VALUE!	#VALUE!	#VALUE!	#VALUE!	#VALUE!	#VALUE!	#VALUE!	#VALUE!	#VALUE!	#VALUE!	#VALUE!	#VALUE!	#VALUE!	#VALUE!	#VALUE!
						107	ERR	#VALUE!	#VALUE!	#VALUE!	#VALUE!	#VALUE!	#VALUE!	#VALUE!	#VALUE!	#VALUE!	#VALUE!	#VALUE!	#VALUE!	#VALUE!	#VALUE!	#VALUE!	#VALUE!	#VALUE!
						108	ERR	#VALUE!	#VALUE!	#VALUE!	#VALUE!	#VALUE!	#VALUE!	#VALUE!	#VALUE!	#VALUE!	#VALUE!	#VALUE!	#VALUE!	#VALUE!	#VALUE!	#VALUE!	#VALUE!	#VALUE!
						109	ERR	#VALUE!	#VALUE!	#VALUE!	#VALUE!	#VALUE!	#VALUE!	#VALUE!	#VALUE!	#VALUE!	#VALUE!	#VALUE!	#VALUE!	#VALUE!	#VALUE!	#VALUE!	#VALUE!	#VALUE!
						110	ERR	#VALUE!	#VALUE!	#VALUE!	#VALUE!	#VALUE!	#VALUE!	#VALUE!	#VALUE!	#VALUE!	#VALUE!	#VALUE!	#VALUE!	#VALUE!	#VALUE!	#VALUE!	#VALUE!	#VALUE!
						111	ERR	#VALUE!	#VALUE!	#VALUE!	#VALUE!	#VALUE!	#VALUE!	#VALUE!	#VALUE!	#VALUE!	#VALUE!	#VALUE!	#VALUE!	#VALUE!	#VALUE!	#VALUE!	#VALUE!	#VALUE!
						112	ERR	#VALUE!	#VALUE!	#VALUE!	#VALUE!	#VALUE!	#VALUE!	#VALUE!	#VALUE!	#VALUE!	#VALUE!	#VALUE!	#VALUE!	#VALUE!	#VALUE!	#VALUE!	#VALUE!	#VALUE!
						113	ERR	#VALUE!	#VALUE!	#VALUE!	#VALUE!	#VALUE!	#VALUE!	#VALUE!	#VALUE!	#VALUE!	#VALUE!	#VALUE!	#VALUE!	#VALUE!	#VALUE!	#VALUE!	#VALUE!	#VALUE!
						114	ERR	#VALUE!	#VALUE!	#VALUE!	#VALUE!	#VALUE!	#VALUE!	#VALUE!	#VALUE!	#VALUE!	#VALUE!	#VALUE!	#VALUE!	#VALUE!	#VALUE!	#VALUE!	#VALUE!	#VALUE!
						115	ERR	#VALUE!	#VALUE!	#VALUE!	#VALUE!	#VALUE!	#VALUE!	#VALUE!	#VALUE!	#VALUE!	#VALUE!	#VALUE!	#VALUE!	#VALUE!	#VALUE!	#VALUE!	#VALUE!	#VALUE!
						116	ERR	#VALUE!	#VALUE!	#VALUE!	#VALUE!	#VALUE!	#VALUE!	#VALUE!	#VALUE!	#VALUE!	#VALUE!	#VALUE!	#VALUE!	#VALUE!	#VALUE!	#VALUE!	#VALUE!	#VALUE!
						117	ERR	#VALUE!	#VALUE!	#VALUE!	#VALUE!	#VALUE!	#VALUE!	#VALUE!	#VALUE!	#VALUE!	#VALUE!	#VALUE!	#VALUE!	#VALUE!	#VALUE!	#VALUE!	#VALUE!	#VALUE!
						118	ERR	#VALUE!	#VALUE!	#VALUE!	#VALUE!	#VALUE!	#VALUE!	#VALUE!	#VALUE!	#VALUE!	#VALUE!	#VALUE!	#VALUE!	#VALUE!	#VALUE!	#VALUE!	#VALUE!	#VALUE!
						119	ERR	#VALUE!	#VALUE!	#VALUE!	#VALUE!	#VALUE!	#VALUE!	#VALUE!	#VALUE!	#VALUE!	#VALUE!	#VALUE!	#VALUE!	#VALUE!	#VALUE!	#VALUE!	#VALUE!	#VALUE!
						120	ERR	#VALUE!	#VALUE!	#VALUE!	#VALUE!	#VALUE!	#VALUE!	#VALUE!	#VALUE!	#VALUE!	#VALUE!	#VALUE!	#VALUE!	#VALUE!	#VALUE!	#VALUE!	#VALUE!	#VALUE!
						121	ERR	#VALUE!	#VALUE!	#VALUE!	#VALUE!	#VALUE!	#VALUE!	#VALUE!	#VALUE!	#VALUE!	#VALUE!	#VALUE!	#VALUE!	#VALUE!	#VALUE!	#VALUE!	#VALUE!	#VALUE!
						122	ERR	#VALUE!	#VALUE!	#VALUE!	#VALUE!	#VALUE!	#VALUE!	#VALUE!	#VALUE!	#VALUE!	#VALUE!	#VALUE!	#VALUE!	#VALUE!	#VALUE!	#VALUE!	#VALUE!	#VALUE!
						123	ERR	#VALUE!	#VALUE!	#VALUE!	#VALUE!	#VALUE!	#VALUE!	#VALUE!	#VALUE!	#VALUE!	#VALUE!	#VALUE!	#VALUE!	#VALUE!	#VALUE!	#VALUE!	#VALUE!	#VALUE!
						124	ERR	#VALUE!	#VALUE!	#VALUE!	#VALUE!	#VALUE!	#VALUE!	#VALUE!	#VALUE!	#VALUE!	#VALUE!	#VALUE!	#VALUE!	#VALUE!	#VALUE!	#VALUE!	#VALUE!	#VALUE!
						125	ERR	#VALUE!	#VALUE!	#VALUE!	#VALUE!	#VALUE!	#VALUE!	#VALUE!	#VALUE!	#VALUE!	#VALUE!	#VALUE!	#VALUE!	#VALUE!	#VALUE!	#VALUE!	#VALUE!	#VALUE!
						126	ERR	#VALUE!	#VALUE!	#VALUE!	#VALUE!	#VALUE!	#VALUE!	#VALUE!	#VALUE!	#VALUE!	#VALUE!	#VALUE!	#VALUE!	#VALUE!	#VALUE!	#VALUE!	#VALUE!	#VALUE!
						127	ERR	#VALUE!	#VALUE!	#VALUE!	#VALUE!	#VALUE!	#VALUE!	#VALUE!	#VALUE!	#VALUE!	#VALUE!	#VALUE!	#VALUE!	#VALUE!	#VALUE!	#VALUE!	#VALUE!	#VALUE!
						128	ERR	#VALUE!	#VALUE!	#VALUE!	#VALUE!	#VALUE!	#VALUE!	#VALUE!	#VALUE!	#VALUE!	#VALUE!	#VALUE!	#VALUE!	#VALUE!	#VALUE!	#VALUE!	#VALUE!	#VALUE!
						129	ERR	#VALUE!	#VALUE!	#VALUE!	#VALUE!	#VALUE!	#VALUE!	#VALUE!	#VALUE!	#VALUE!	#VALUE!	#VALUE!	#VALUE!	#VALUE!	#VALUE!	#VALUE!	#VALUE!	#VALUE!
						130	ERR	#VALUE!	#VALUE!	#VALUE!	#VALUE!	#VALUE!	#VALUE!	#VALUE!	#VALUE!	#VALUE!	#VALUE!	#VALUE!	#VALUE!	#VALUE!	#VALUE!	#VALUE!	#VALUE!	#VALUE!
						131	ERR	#VALUE!	#VALUE!	#VALUE!	#VALUE!	#VALUE!	#VALUE!	#VALUE!	#VALUE!	#VALUE!	#VALUE!	#VALUE!	#VALUE!	#VALUE!	#VALUE!	#VALUE!	#VALUE!	#VALUE!
						132	ERR	#VALUE!	#VALUE!	#VALUE!	#VALUE!	#VALUE!	#VALUE!	#VALUE!	#VALUE!	#VALUE!	#VALUE!	#VALUE!	#VALUE!	#VALUE!	#VALUE!	#VALUE!	#VALUE!	#VALUE!
						133	ERR	#VALUE!	#VALUE!	#VALUE!	#VALUE!	#VALUE!	#VALUE!	#VALUE!	#VALUE!	#VALUE!	#VALUE!	#VALUE!	#VALUE!	#VALUE!	#VALUE!	#VALUE!	#VALUE!	#VALUE!
						134	ERR	#VALUE!	#VALUE!	#VALUE!	#VALUE!	#VALUE!	#VALUE!	#VALUE!	#VALUE!	#VALUE!	#VALUE!	#VALUE!	#VALUE!	#VALUE!	#VALUE!	#VALUE!	#VALUE!	#VALUE!
						135	ERR	#VALUE!	#VALUE!	#VALUE!	#VALUE!	#VALUE!	#VALUE!	#VALUE!	#VALUE!	#VALUE!	#VALUE!	#VALUE!	#VALUE!	#VALUE!	#VALUE!	#VALUE!	#VALUE!	#VALUE!
						136	ERR	#VALUE!	#VALUE!	#VALUE!	#VALUE!	#VALUE!	#VALUE!	#VALUE!	#VALUE!	#VALUE!	#VALUE!	#VALUE!	#VALUE!	#VALUE!	#VALUE!	#VALUE!	#VALUE!	#VALUE!
						137	ERR	#VALUE!	#VALUE!	#VALUE!	#VALUE!	#VALUE!	#VALUE!	#VALUE!	#VALUE!	#VALUE!	#VALUE!	#VALUE!	#VALUE!	#VALUE!	#VALUE!	#VALUE!	#VALUE!	#VALUE!
						138	ERR	#VALUE!	#VALUE!	#VALUE!	#VALUE!	#VALUE!	#VALUE!	#VALUE!	#VALUE!	#VALUE!	#VALUE!	#VALUE!	#VALUE!	#VALUE!	#VALUE!	#VALUE!	#VALUE!	#VALUE!
						139	ERR	#VALUE!	#VALUE!	#VALUE!	#VALUE!	#VALUE!	#VALUE!	#VALUE!	#VALUE!	#VALUE!	#VALUE!	#VALUE!	#VALUE!	#VALUE!	#VALUE!	#VALUE!	#VALUE!	#VALUE!
						140	ERR	#VALUE!	#VALUE!	#VALUE!	#VALUE!	#VALUE!	#VALUE!	#VALUE!	#VALUE!	#VALUE!	#VALUE!	#VALUE!	#VALUE!	#VALUE!	#VALUE!	#VALUE!	#VALUE!	#VALUE!
						141	ERR	#VALUE!	#VALUE!	#VALUE!	#VALUE!	#VALUE!	#VALUE!	#VALUE!	#VALUE!	#VALUE!	#VALUE!	#VALUE!	#VALUE!	#VALUE!	#VALUE!	#VALUE!	#VALUE!	#VALUE!
						142	ERR	#VALUE!	#VALUE!	#VALUE!	#VALUE!	#VALUE!	#VALUE!	#VALUE!	#VALUE!	#VALUE!	#VALUE!	#VALUE!	#VALUE!	#VALUE!	#VALUE!	#VALUE!	#VALUE!	#VALUE!
						143	ERR	#VALUE!	#VALUE!	#VALUE!	#VALUE!	#VALUE!	#VALUE!	#VALUE!	#VALUE!	#VALUE!	#VALUE!	#VALUE!	#VALUE!	#VALUE!	#VALUE!	#VALUE!	#VALUE!	#VALUE!
						144	ERR	#VALUE!	#VALUE!	#VALUE!	#VALUE!	#VALUE!	#VALUE!	#VALUE!	#VALUE!	#VALUE!	#VALUE!	#VALUE!	#VALUE!	#VALUE!	#VALUE!	#VALUE!	#VALUE!	#VALUE!
						145	ERR	#VALUE!	#VALUE!	#VALUE!	#VALUE!	#VALUE!	#VALUE!	#VALUE!	#VALUE!	#VALUE!	#VALUE!	#VALUE!	#VALUE!	#VALUE!	#VALUE!	#VALUE!	#VALUE!	#VALUE!
						146	ERR	#VALUE!	#VALUE!	#VALUE!	#VALUE!	#VALUE!	#VALUE!	#VALUE!	#VALUE!	#VALUE!	#VALUE!	#VALUE!	#VALUE!	#VALUE!	#VALUE!	#VALUE!	#VALUE!	#VALUE!
						147	ERR	#VALUE!	#VALUE!	#VALUE!	#VALUE!	#VALUE!	#VALUE!	#VALUE!	#VALUE!	#VALUE!	#VALUE!	#VALUE!	#VALUE!	#VALUE!	#VALUE!	#VALUE!	#VALUE!	#VALUE!
						148	ERR	#VALUE!	#VALUE!	#VALUE!	#VALUE!	#VALUE!	#VALUE!	#VALUE!	#VALUE!	#VALUE!	#VALUE!	#VALUE!	#VALUE!	#VALUE!	#VALUE!	#VALUE!	#VALUE!	#VALUE!
						149	ERR	#VALUE!	#VALUE!	#VALUE!	#VALUE!	#VALUE!	#VALUE!	#VALUE!	#VALUE!	#VALUE!	#VALUE!	#VALUE!	#VALUE!	#VALUE!	#VALUE!	#VALUE!	#VALUE!	#VALUE!
						150	ERR	#VALUE!	#VALUE!	#VALUE!	#VALUE!	#VALUE!	#VALUE!	#VALUE!	#VALUE!	#VALUE!	#VALUE!	#VALUE!	#VALUE!	#VALUE!	#VALUE!	#VALUE!	#VALUE!	#VALUE!
						151	ERR	#VALUE!	#VALUE!	#VALUE!	#VALUE!	#VALUE!	#VALUE!	#VALUE!	#VALUE!	#VALUE!	#VALUE!	#VALUE!	#VALUE!	#VALUE!	#VALUE!	#VALUE!	#VALUE!	#VALUE!
						152	ERR	#VALUE!	#VALUE!	#VALUE!	#VALUE!	#VALUE!	#VALUE!	#VALUE!	#VALUE!	#VALUE!	#VALUE!	#VALUE!	#VALUE!	#VALUE!	#VALUE!	#VALUE!	#VALUE!	#VALUE!
						153	ERR	#VALUE!	#VALUE!	#VALUE!	#VALUE!	#VALUE!	#VALUE!	#VALUE!	#VALUE!	#VALUE!	#VALUE!	#VALUE!	#VALUE!	#VALUE!	#VALUE!	#VALUE!	#VALUE!	#VALUE!
						154	ERR	#VALUE!	#VALUE!	#VALUE!	#VALUE!	#VALUE!	#VALUE!	#VALUE!	#VALUE!	#VALUE!	#VALUE!	#VALUE!	#VALUE!	#VALUE!	#VALUE!	#VALUE!	#VALUE!	#VALUE!
						155	ERR	#VALUE!	#VALUE!	#VALUE!	#VALUE!	#VALUE!	#VALUE!	#VALUE!	#VALUE!	#VALUE!	#VALUE!	#VALUE!	#VALUE!	#VALUE!	#VALUE!	#VALUE!	#VALUE!	#VALUE!
						156	ERR	#VALUE!	#VALUE!	#VALUE!	#VALUE!	#VALUE!	#VALUE!	#VALUE!	#VALUE!	#VALUE!	#VALUE!	#VALUE!	#VALUE!	#VALUE!	#VALUE!	#VALUE!	#VALUE!	#VALUE!
						157	ERR	#VALUE!	#VALUE!	#VALUE!	#VALUE!	#VALUE!	#VALUE!	#VALUE!	#VALUE!	#VALUE!	#VALUE!	#VALUE!	#VALUE!	#VALUE!	#VALUE!	#VALUE!	#VALUE!	#VALUE!
						158	ERR	#VALUE!	#VALUE!	#VALUE!	#VALUE!	#VALUE!	#VALUE!	#VALUE!	#VALUE!	#VALUE!	#VALUE!	#VALUE!	#VALUE!	#VALUE!	#VALUE!	#VALUE!	#VALUE!	#VALUE!
						159	ERR	#VALUE!	#VALUE!	#VALUE!	#VALUE!	#VALUE!	#VALUE!	#VALUE!	#VALUE!	#VALUE!	#VALUE!	#VALUE!	#VALUE!	#VALUE!	#VALUE!	#VALUE!	#VALUE!	#VALUE!
						160	ERR	#VALUE!	#VALUE!	#VALUE!	#VALUE!	#VALUE!	#VALUE!	#VALUE!	#VALUE!	#VALUE!	#VALUE!	#VALUE!	#VALUE!	#VALUE!	#VALUE!	#VALUE!	#VALUE!	#VALUE!
						161	ERR	#VALUE!	#VALUE!	#VALUE!	#VALUE!	#VALUE!	#VALUE!	#VALUE!	#VALUE!	#VALUE!	#VALUE!	#VALUE!	#VALUE!	#VALUE!	#VALUE!	#VALUE!	#VALUE!	#VALUE!
						162	ERR	#VALUE!	#VALUE!	#VALUE!	#VALUE!	#VALUE!	#VALUE!	#VALUE!	#VALUE!	#VALUE!	#VALUE!	#VALUE!	#VALUE!	#VALUE!	#VALUE!	#VALUE!	#VALUE!	#VALUE!
						163	ERR	#VALUE!	#VALUE!	#VALUE!	#VALUE!	#VALUE!	#VALUE!	#VALUE!	#VALUE!	#VALUE!	#VALUE!	#VALUE!	#VALUE!	#VALUE!	#VALUE!	#VALUE!	#VALUE!	#VALUE!
						164	ERR	#VALUE!	#VALUE!	#VALUE!	#VALUE!	#VALUE!	#VALUE!	#VALUE!	#VALUE!	#VALUE!	#VALUE!	#VALUE!	#VALUE!	#VALUE!	#VALUE!	#VALUE!	#VALUE!	#VALUE!
						165	ERR	#VALUE!	#VALUE!	#VALUE!	#VALUE!	#VALUE!	#VALUE!	#VALUE!	#VALUE!	#VALUE!	#VALUE!	#VALUE!	#VALUE!	#VALUE!	#VALUE!	#VALUE!	#VALUE!	#VALUE!
						166	ERR	#VALUE!	#VALUE!	#VALUE!	#VALUE!	#VALUE!	#VALUE!	#VALUE!	#VALUE!	#VALUE!	#VALUE!	#VALUE!	#VALUE!	#VALUE!	#VALUE!	#VALUE!	#VALUE!	#VALUE!
						167	ERR	#VALUE!	#VALUE!	#VALUE!	#VALUE!	#VALUE!	#VALUE!	#VALUE!	#VALUE!	#VALUE!	#VALUE!	#VALUE!	#VALUE!	#VALUE!	#VALUE!	#VALUE!	#VALUE!	#VALUE!
						168	ERR	#VALUE!	#VALUE!	#VALUE!	#VALUE!	#VALUE!	#VALUE!	#VALUE!	#VALUE!	#VALUE!	#VALUE!	#VALUE!	#VALUE!	#VALUE!	#VALUE!	#VALUE!	#VALUE!	#VALUE!
						169	ERR	#VALUE!	#VALUE!	#VALUE!	#VALUE!	#VALUE!	#VALUE!	#VALUE!	#VALUE!	#VALUE!	#VALUE!	#VALUE!	#VALUE!	#VALUE!	#VALUE!	#VALUE!	#VALUE!	#VALUE!
						170	ERR	#VALUE!	#VALUE!	#VALUE!	#VALUE!	#VALUE!	#VALUE!	#VALUE!	#VALUE!	#VALUE!	#VALUE!	#VALUE!	#VALUE!	#VALUE!	#VALUE!	#VALUE!	#VALUE!	#VALUE!
						171	ERR	#VALUE!	#VALUE!	#VALUE!	#VALUE!	#VALUE!	#VALUE!	#VALUE!	#VALUE!	#VALUE!	#VALUE!	#VALUE!	#VALUE!	#VALUE!	#VALUE!	#VALUE!	#VALUE!	#VALUE!
						172	ERR	#VALUE!	#VALUE!	#VALUE!	#VALUE!	#VALUE!	#VALUE!	#VALUE!	#VALUE!	#VALUE!	#VALUE!	#VALUE!	#VALUE!	#VALUE!	#VALUE!	#VALUE!	#VALUE!	#VALUE!
						173	ERR	#VALUE!	#VALUE!	#VALUE!	#VALUE!	#VALUE!	#VALUE!	#VALUE!	#VALUE!	#VALUE!	#VALUE!	#VALUE!	#VALUE!	#VALUE!	#VALUE!	#VALUE!	#VALUE!	#VALUE!
						174	ERR	#VALUE!	#VALUE!	#VALUE!	#VALUE!	#VALUE!	#VALUE!	#VALUE!	#VALUE!	#VALUE!	#VALUE!	#VALUE!	#VALUE!	#VALUE!	#VALUE!	#VALUE!	#VALUE!	#VALUE!
						175	ERR	#VALUE!	#VALUE!	#VALUE!	#VALUE!	#VALUE!	#VALUE!	#VALUE!	#VALUE!	#VALUE!	#VALUE!	#VALUE!	#VALUE!	#VALUE!	#VALUE!	#VALUE!	#VALUE!	#VALUE!
						176	ERR	#VALUE!	#VALUE!	#VALUE!	#VALUE!	#VALUE!	#VALUE!	#VALUE!	#VALUE!	#VALUE!	#VALUE!	#VALUE!	#VALUE!	#VALUE!	#VALUE!	#VALUE!	#VALUE!	#VALUE!
						177	ERR	#VALUE!	#VALUE!	#VALUE!	#VALUE!	#VALUE!	#VALUE!	#VALUE!	#VALUE!	#VALUE!	#VALUE!	#VALUE!	#VALUE!	#VALUE!	#VALUE!	#VALUE!	#VALUE!	#VALUE!
						178	ERR	#VALUE!	#VALUE!	#VALUE!	#VALUE!	#VALUE!	#VALUE!	#VALUE!	#VALUE!	#VALUE!	#VALUE!	#VALUE!	#VALUE!	#VALUE!	#VALUE!	#VALUE!	#VALUE!	#VALUE!
						179	ERR	#VALUE!	#VALUE!	#VALUE!	#VALUE!	#VALUE!	#VALUE!	#VALUE!	#VALUE!	#VALUE!	#VALUE!	#VALUE!	#VALUE!	#VALUE!	#VALUE!	#VALUE!	#VALUE!	#VALUE!
						180	ERR	#VALUE!	#VALUE!	#VALUE!	#VALUE!	#VALUE!	#VALUE!	#VALUE!	#VALUE!	#VALUE!	#VALUE!	#VALUE!	#VALUE!	#VALUE!	#VALUE!	#VALUE!	#VALUE!	#VALUE!
						181	ERR	#VALUE!	#VALUE!	#VALUE!	#VALUE!	#VALUE!	#VALUE!	#VALUE!	#VALUE!	#VALUE!	#VALUE!	#VALUE!	#VALUE!	#VALUE!	#VALUE!	#VALUE!	#VALUE!	#VALUE!
						182	ERR	#VALUE!	#VALUE!	#VALUE!	#VALUE!	#VALUE!	#VALUE!	#VALUE!	#VALUE!	#VALUE!	#VALUE!	#VALUE!	#VALUE!	#VALUE!	#VALUE!	#VALUE!	#VALUE!	#VALUE!
						183	ERR	#VALUE!	#VALUE!	#VALUE!	#VALUE!	#VALUE!	#VALUE!	#VALUE!	#VALUE!	#VALUE!	#VALUE!	#VALUE!	#VALUE!	#VALUE!	#VALUE!	#VALUE!	#VALUE!	#VALUE!
						184	ERR	#VALUE!	#VALUE!	#VALUE!	#VALUE!	#VALUE!	#VALUE!	#VALUE!	#VALUE!	#VALUE!	#VALUE!	#VALUE!	#VALUE!	#VALUE!	#VALUE!	#VALUE!	#VALUE!	#VALUE!
						185	ERR	#VALUE!	#VALUE!	#VALUE!	#VALUE!	#VALUE!	#VALUE!	#VALUE!	#VALUE!	#VALUE!	#VALUE!	#VALUE!	#VALUE!	#VALUE!	#VALUE!	#VALUE!	#VALUE!	#VALUE!
						186	ERR	#VALUE!	#VALUE!	#VALUE!	#VALUE!	#VALUE!	#VALUE!	#VALUE!	#VALUE!	#VALUE!	#VALUE!	#VALUE!	#VALUE!	#VALUE!	#VALUE!	#VALUE!	#VALUE!	#VALUE!
						187	ERR	#VALUE!	#VALUE!	#VALUE!	#VALUE!	#VALUE!	#VALUE!	#VALUE!	#VALUE!	#VALUE!	#VALUE!	#VALUE!	#VALUE!	#VALUE!	#VALUE!	#VALUE!	#VALUE!	#VALUE!
						188	ERR	#VALUE!	#VALUE!	#VALUE!	#VALUE!	#VALUE!	#VALUE!	#VALUE!	#VALUE!	#VALUE!	#VALUE!	#VALUE!	#VALUE!	#VALUE!	#VALUE!	#VALUE!	#VALUE!	#VALUE!
						189	ERR	#VALUE!	#VALUE!	#VALUE!	#VALUE!	#VALUE!	#VALUE!	#VALUE!	#VALUE!	#VALUE!	#VALUE!	#VALUE!	#VALUE!	#VALUE!	#VALUE!	#VALUE!	#VALUE!	#VALUE!
						190	ERR	#VALUE!	#VALUE!	#VALUE!	#VALUE!	#VALUE!	#VALUE!	#VALUE!	#VALUE!	#VALUE!	#VALUE!	#VALUE!	#VALUE!	#VALUE!	#VALUE!	#VALUE!	#VALUE!	#VALUE!
						191	ERR	#VALUE!	#VALUE!	#VALUE!	#VALUE!	#VALUE!	#VALUE!	#VALUE!	#VALUE!	#VALUE!	#VALUE!	#VALUE!	#VALUE!	#VALUE!	#VALUE!	#VALUE!	#VALUE!	#VALUE!
						192	ERR	#VALUE!	#VALUE!	#VALUE!	#VALUE!	#VALUE!	#VALUE!	#VALUE!	#VALUE!	#VALUE!	#VALUE!	#VALUE!	#VALUE!	#VALUE!	#VALUE!	#VALUE!	#VALUE!	#VALUE!
						193	ERR	#VALUE!	#VALUE!	#VALUE!	#VALUE!	#VALUE!	#VALUE!	#VALUE!	#VALUE!	#VALUE!	#VALUE!	#VALUE!	#VALUE!	#VALUE!	#VALUE!	#VALUE!	#VALUE!	#VALUE!
						194	ERR	#VALUE!	#VALUE!	#VALUE!	#VALUE!	#VALUE!	#VALUE!	#VALUE!	#VALUE!	#VALUE!	#VALUE!	#VALUE!	#VALUE!	#VALUE!	#VALUE!	#VALUE!	#VALUE!	#VALUE!
						195	ERR	#VALUE!	#VALUE!	#VALUE!	#VALUE!	#VALUE!	#VALUE!	#VALUE!	#VALUE!	#VALUE!	#VALUE!	#VALUE!	#VALUE!	#VALUE!	#VALUE!	#VALUE!	#VALUE!	#VALUE!
						196	ERR	#VALUE!	#VALUE!	#VALUE!	#VALUE!	#VALUE!	#VALUE!	#VALUE!	#VALUE!	#VALUE!	#VALUE!	#VALUE!	#VALUE!	#VALUE!	#VALUE!	#VALUE!	#VALUE!	#VALUE!
						197	ERR	#VALUE!	#VALUE!	#VALUE!	#VALUE!	#VALUE!	#VALUE!	#VALUE!	#VALUE!	#VALUE!	#VALUE!	#VALUE!	#VALUE!	#VALUE!	#VALUE!	#VALUE!	#VALUE!	#VALUE!
						198	ERR	#VALUE!	#VALUE!	#VALUE!	#VALUE!	#VALUE!	#VALUE!	#VALUE!	#VALUE!	#VALUE!	#VALUE!	#VALUE!	#VALUE!	#VALUE!	#VALUE!	#VALUE!	#VALUE!	#VALUE!
						199	ERR	#VALUE!	#VALUE!	#VALUE!	#VALUE!	#VALUE!	#VALUE!	#VALUE!	#VALUE!	#VALUE!	#VALUE!	#VALUE!	#VALUE!	#VALUE!	#VALUE!	#VALUE!	#VALUE!	#VALUE!
						200	ERR	#VALUE!	#VALUE!	#VALUE!	#VALUE!	#VALUE!	#VALUE!	#VALUE!	#VALUE!	#VALUE!	#VALUE!	#VALUE!	#VALUE!	#VALUE!	#VALUE!	#VALUE!	#VALUE!	#VALUE!
						Totals			#NAME?
									Total Gross Energy (MJ Primairy)	Electricity (MJ Primairy)	Feedstock energy (MJ Primairy)	Water process (L)	Cooling Water (L)	Hazardous Solid Waste (g)	Non Hazardous Waste (g)	Global warming Potential	AD	Volatile Organic Compounds (mg)	Persistant Organic Pollutants	Heavy Metals	PAH	PM	Heavy Metals to water	Eutr
					Manufacturing			MANUFACTURING TOTAL	2034.66	1176.04	61.7537	16.1239	505.507	1.28539	9406.65	115.779	502.134	1.97921	228.808	531.261	0.713008	76.6302	17.2076	799.796
					OEM Plastics Manufacturing (fixed)	201			494.126	297.468	17.0276	4.47553	140.314	0	1548.29	27.4171	118.205	0.0349699	0	0	0.151227	18.2287	0	288.838
					Foundries Fe/Cu/Zn (fixed)	202			0	0	0	0	0	0	0	0	0	0	0	0	0	0	0	0
					Foundries Al/Mg (fixed)	203			0	0	0	0	0	0	0	0	0	0	0	0	0	0	0	0
					Sheetmetal Manufacturing (fixed)	204			1286.05	774.216	44.3174	11.6484	365.193	0	4029.71	71.358	307.651	0.0910156	0	0	0.393596	47.4436	0	510.011
					PWB Manufacturing (fixed)	205			0	0	0	0	0	0	0	0	0	0	0	0	0	0	0	0
					Other materials (Manufacturing already included)	206
					Sheetmetal Scrap (Please adjust percentage only)	207			254.484	104.357	0.408774	0	0	1.28539	3828.65	17.0042	76.2788	1.85322	228.808	531.261	0.168186	10.9579	17.2076	0.947611
									4	5	6	7	8	9	10	11	12	13	14	15	16	17	18	19
									MJ	MJ	MJ	water proces	Water cool	waste haz	waste non	GWP	AD	VOC	POP	HM	PAH	PM	HM (water)	Eutr
					DISTRIBUTION (incl. Final Assembly)			DISTRIBUTION TOTAL	712.604	1.42433	0	0	0	8.08908	407.015	46.6883	142.191	10.5103	2.30095	20.6856	24.9172	1716.44	0.642505	10.7931
					Description		0	per product 62	51.5	0	0	0	0	1.02073	51.3597	4.5247	12.1612	0.050813	0.290348	2.6179	2.6179	0.256753	0.080242	1.36195
					Is it an ICT or Consumer Electronics product <15 kg ?	208		ICT per m3 60	0	0	0	0	0	0	0	0	0	0	0	0	0	0	0	0
					Is it an installed appliance (e.g. boiler)?	209	0	appliance per m3 61	351.385	1.42433	0	0	0	2.76514	139.133	23.4231	75.3626	7.8929	0.786547	7.03111	17.9396	1608.13	0.223978	3.68949
								retail per m3 63	250.747	0	0	0	0	3.21443	161.739	14.7128	41.9274	2.52289	0.914346	8.24414	4.26663	107.777	0.252694	4.28896
					Volume of packaged final product in m3	210		installed per m3 64	0	0	0	0	0	0	0	0	0	0	0	0	0	0	0	0
								retail per product 65	58.9722	0	0	0	0	1.08878	54.7837	4.02775	12.7394	0.0436835	0.309704	2.79243	0.0930831	0.269827	0.0855915	1.45274
					USE PHASE				MJ	MJ	MJ	water proces	Water cool	waste haz	waste non	GWP	AD	VOC	POP	HM	PAH	PM	HM (water)	Eutr
					Description		#N/A	USE PHASE TOTAL
					Product Life in years	211		energy subtot	0	0	0	0	0	0	0	0	0	0	0	0	0	0	0	0
					Energy
					ELECTRICITY Total over Product Life indirect ERP	243	elec	66	0	0	0	0	0	0	0	0	0	0	0	0	0	0	0	0
					HEAT Total over Product Life indirect ERP	246	heat in	86	0	0	0	0	0	0	0	0	0	0	0	0	0	0	0	0
					HEAT Total over Product Life direct ERP	247	heat dir	86	0	0	0	0	0	0	0	0	0	0	0	0	0	0	0	0
					Consumables (excl, spare parts)			consumables subtot	668670	0	0	0	0	0	0	157356	465	0	0	0	0	0	0	0
					Water	248		84	0	0	0	0	0	0	0	0	0	0	0	0	0	0	0	0
					Auxilliary material 1 (Click & select)	249		121	668670	0	0	0	0	0	0	157356	465	0	0	0	0	0	0	0
					Auxilliary material 2 (Click & select)	250		86	0	0	0	0	0	0	0	0	0	0	0	0	0	0	0	0
					Auxilliary material 3 (Click & select)	251		86	0	0	0	0	0	0	0	0	0	0	0	0	0	0	0	0
					Refrigerant (Click & select)	252		15	0	0	0	0	0	0	0	0	0	0	0	0	0	0	0	0
					Maintenance, Repairs, Service			maintenance subtot	3882.42	22.7694	6.95423	68.397	31.4821	0.560854	1086.09	265.118	4288.06	763.606	113.89	726.668	1451.6	341.404	1808.43	99688
					No. of km over Product-Life	241		87	0	0	0	0	0	0	0	0	0	0	0	0	0	0	0	0
					Spare parts (fixed, 1% of product materials & manuf.)	242		spare parts (1%)	3882.42	22.7694	6.95423	68.397	31.4821	0.560854	1086.09	265.118	4288.06	763.606	113.89	726.668	1451.6	341.404	1808.43	99688
in g					DISPOSAL & RECYCLING			weight share %	MJ	MJ	MJ	water proces	Water cool	waste haz	waste non	GWP	AD	VOC	POP	HM	PAH	PM	HM (water)	Eutr
426701					Re-use	263		0.00903662	-27722.8	#DIV/0!	#DIV/0!	#DIV/0!	#DIV/0!	#DIV/0!	#DIV/0!	-1897.38	-12211.1	-6563.79	-825.335	-5217.87	-10710.8	-2721.73	-12941.8	-638754
6454.24					Recycle	264		0.000136687	-3251.47	#DIV/0!	#DIV/0!	#DIV/0!	#DIV/0!	#DIV/0!	#DIV/0!	-200.912	-11128.7	-233.632	-84.6563	-596.934	-1086.81	-173.303	-1525.4	-113633
25326.3					Recover	265		0.000536358	0	#DIV/0!	#DIV/0!	#DIV/0!	#DIV/0!	#DIV/0!	#DIV/0!	0	0	0	0	0	0	0	0	0
66461.1					Incinerate	266		0.0014075	14.4136	0	0	0	0	0	0	1.07994	2.15128	0.0301179	0	3.87231	0	18.2859	1.22623	69.9166
4.66942e+07					Landfill + unaccounted	267-269		0.988883	47.5317	0	0	0	0	0	157.184	3.548	6.73554	0.197214	5.86755	13.9137	0	61.8843	3.94973	225.806
					TOTAL	270			-30912.3	#DIV/0!	#DIV/0!	#DIV/0!	#DIV/0!	#DIV/0!	#DIV/0!	-2093.66	-23331	-6797.19	-904.124	-5797.02	-11797.6	-2814.86	-14462	-752091
					of which
458482					reuse/recycle/recover	263-265		0.00970967	-30974.3	#DIV/0!	#DIV/0!	#DIV/0!	#DIV/0!	#DIV/0!	#DIV/0!	-2098.29	-23339.8	-6797.42	-909.991	-5814.81	-11797.6	-2895.03	-14467.2	-752387
4.67606e+07					incinerate/landfill	266-269		0.99029	61.9453	0	0	0	0	0	157.184	4.62795	8.88682	0.227332	5.86755	17.786	0	80.1702	5.17596	295.723
								1

## Sheet: EoL
Impacts End-of-Life
	Recycling credit	Rate (from Inputs)	Bulk Plastics
	0.75	1	Re-use
	0.4	0	Recycle
	0.3	0	Recover
	Recycling credit	Rate (from Inputs)	TecPlastics
	0.75	0	Re-use
	0.4	1	Recycle
	0.3	0	Recover
	Recycling credit	Rate (from Inputs)	Ferro
	0.75	1	Re-use
	0.4	0	Recycle
	0	0	Recover
	Recycling credit	Rate (from Inputs)	Non-ferro
	0.75	1	Re-use
	0.4	0	Recycle
	0	0	Recover
	Recycling credit	Rate (from Inputs)	Coating
	0.75	0	Re-use
	0.4	0	Recycle
	0	0	Recover
	Recycling credit	Rate (from Inputs)	Electronics
	0.75	0	Re-use
	0.4	0	Recycle
	0.3	0	Recover
	Recycling credit	Rate (from Inputs)	Misc. excl. refrigerant
	0.75	0	Re-use
	0.4	0	Recycle
	0.3	0	Recover
	Recycling credit	Rate (from Inputs)	Refrigerant
	0.75	0	Re-use
	0.4	0	Recycle
	0.3	0	Recover
	Recycling credit	Rate (from Inputs)	Hg(Mercury)
	0.75	0	Re-use
	0.4	0	Recycle
	0.3	0	Recover
	Recycling credit	Rate (from Inputs)	Extra
	0.75	1	Re-use
	0.4	0	Recycle
	0.3	0	Recover
	Recycling credit	Rate (from Inputs)	Aux. (excl. refrigerant)
	0.75	0	Re-use
	0.4	0	Recycle
	0.3	0	Recover

[truncated: 1 more sheets: Manual]
